# Supplementary material for: The Role of lncRNAs TAPIR-1 and -2 as Diagnostic Markers and Potential Therapeutic Targets in Prostate Cancer
Source: MDPI journal article supplement (doi:10.3390/cancers12051122), 2020-04-30
Supplement: s1 [file s1]

# Supplementary Materials: The Role of lncRNAs TAPIR-1 and -2 as Diagnostic Markers and Potential Therapeutic Targets in Prostate Cancer.

Maik Friedrich, Karolin Wiedemann, Kristin Reiche, Sven-Holger Puppel, Gabriele Pfeifer, Ivonne Zipfel, Stefanie Binder, Ulrike Köhl, Gerd A. Müller, Kurt Engeland, Achim Aigner, Susanne Füssel, Michael Fröhner, Claudia Peitzsch, Anna Dubrovskaya, Michael Rade, Sabina Christ, Stephan Schreiber, Jörg Hackermüller, Jörg Lehmann, Marieta I. Toma, Michael H. Muders, Ulrich Sommer, Gustavo B. Baretton, Manfred Wirth and Friedemann Horn

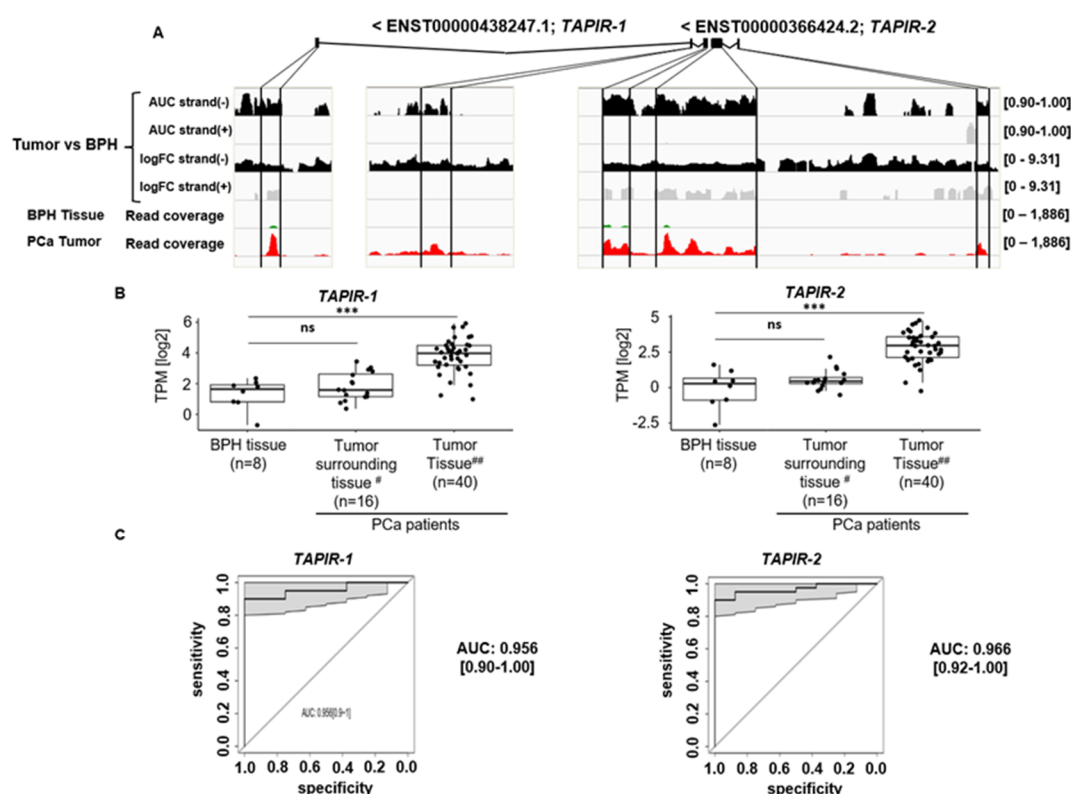

**Figure S1.** Expression of *TAPIR-1* and -2 in prostate tissue of an exploration cohort of BPH- and PCa patients. RNA expression detected by transcriptome-wide NGS analysis of the exploration cohort comprising tissue specimens from 40 PCa patients (40 tumor tissues and 16 paired tumor-adjacent tumor-free tissues) and 8 BPH patients. (A) Area under the ROC curve to discriminate PCa tissue from BPH tissue (AUC; for both strands), logarithmic fold change (logFC; for both strands) and read coverage of a representative PCa and a BPH patient. Values for AUC (range 0.9-1.00), logFC (0-9.31) and read coverage (0-1.886) are shown in squared brackets. (B-C) Box plots and area under the ROC (AUC) analysis of *TAPIR-1* and -2 are shown. ROC analysis for the *TAPIR-1* and -2 revealed PCa diagnostic AUC values of 0.96 [0.90-1.00] and 0.97 [0.92-1.00], respectively,  $FDR \leq 0.001$  (\*\*\*). Non-significant = ns.

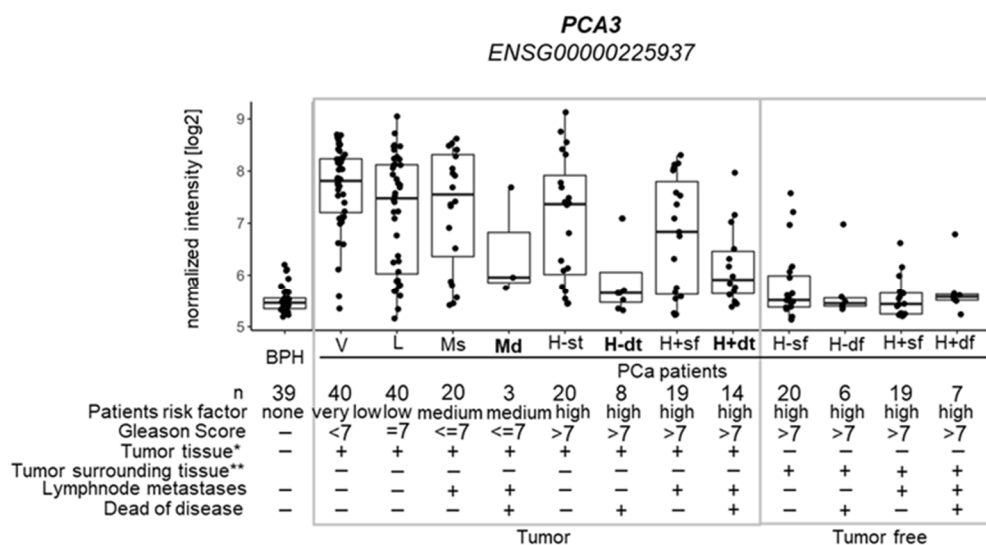

**Figure S2.** Expression patterns of PCA3 in the validation cohort related to clinical risk classification. Expression patterns of *PCA3* determined by microarray analysis is shown related to clinical risk classification. Normalized expression intensity [log2] was plotted against subgroups based on clinical data sets: patient risk factor (none, very low, low, and high); Gleason Score (none, =7, ≤7, >7); tumor tissue (-/+), verified tumor cell content >60% for tumor tissue (denoted with \*; -/+); matched tumor adjacent tissue (-/+), verified tumor cell content 0-5% for matched tumor surrounding tissue (denoted with \*\*; -/+); lymph node metastases (-/+), died of disease (-/+). Groups are defined as follows: BPH, PCa-risk groups: V= very low; L=low; Ms=medium, with lymph node metastases; Md=medium, with lymph node metastases and death because of disease (DoD); Tumor tissue (t): H-st= high, without metastases; H-dt= high, without metastases and DoD; H+st= high with lymph node metastases; and H+dt= high, with metastases and DoD; Matched tumor (free) adjacent tissue (f): H-sf= high, without metastases; H-df= high, without metastases and DoD; H+sf= high with lymph node.



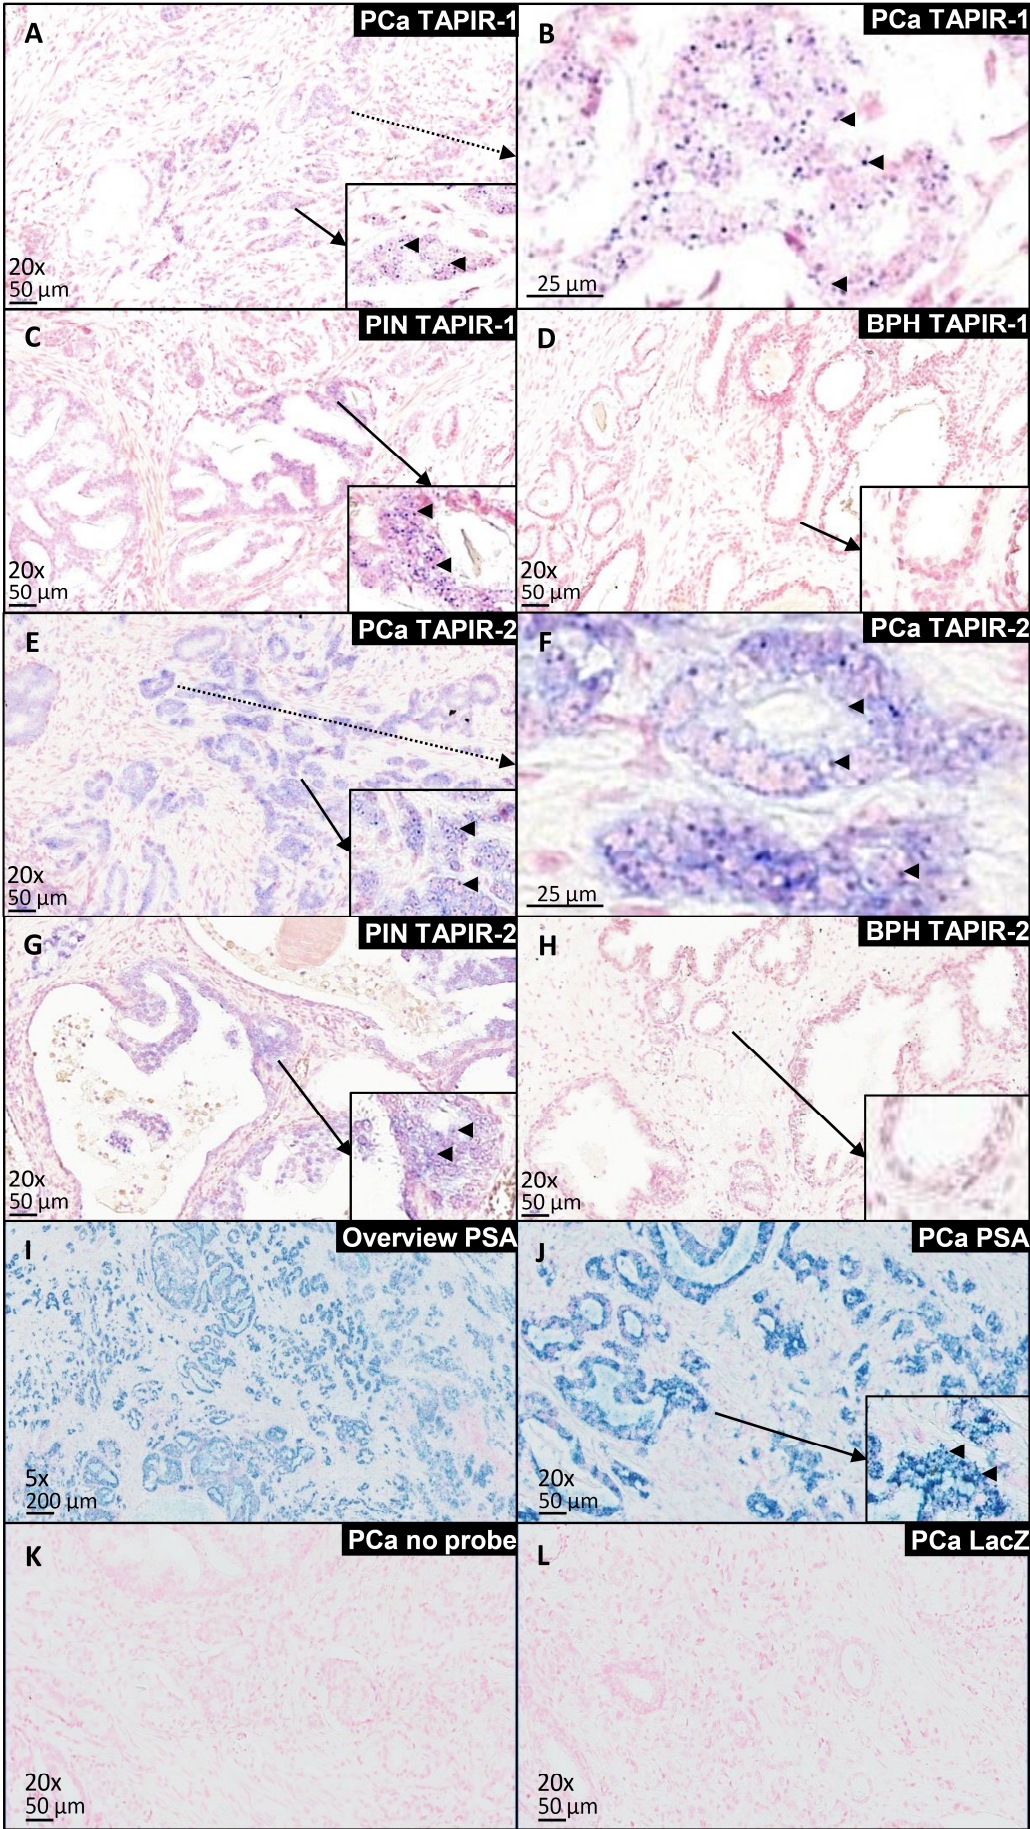

**Figure S3.** Visualization of *TAPIR* transcripts expression in FFPE PCa sections by ViewRNA in situ hybridization analysis. In situ hybridization was performed using the ViewRNA™ technology, following the manufacturer's protocol. Large cut sections of a selected high grade PCa tissue samples were stained for *TAPIR-1* (A-D), *TAPIR-2* (E-H), PSA (as a positive control; I,J), without primary probes (K) and with a bacterial lacZ specific probe (as a negative control; L) by FastBlue dye (blue spots). Counterstaining was done using nuclear fast red (red). Positive *TAPIR-1* and -2 staining was observed in PCa (PCa: A-B, E-F, respectively) and prostatic intraepithelial neoplasia (PIN: C, G) but not in connective tissue. BPH content showed no to weak staining (D, H). Inlays (A-D, E-F, and J) show areas (marked with arrows) at higher magnifications.

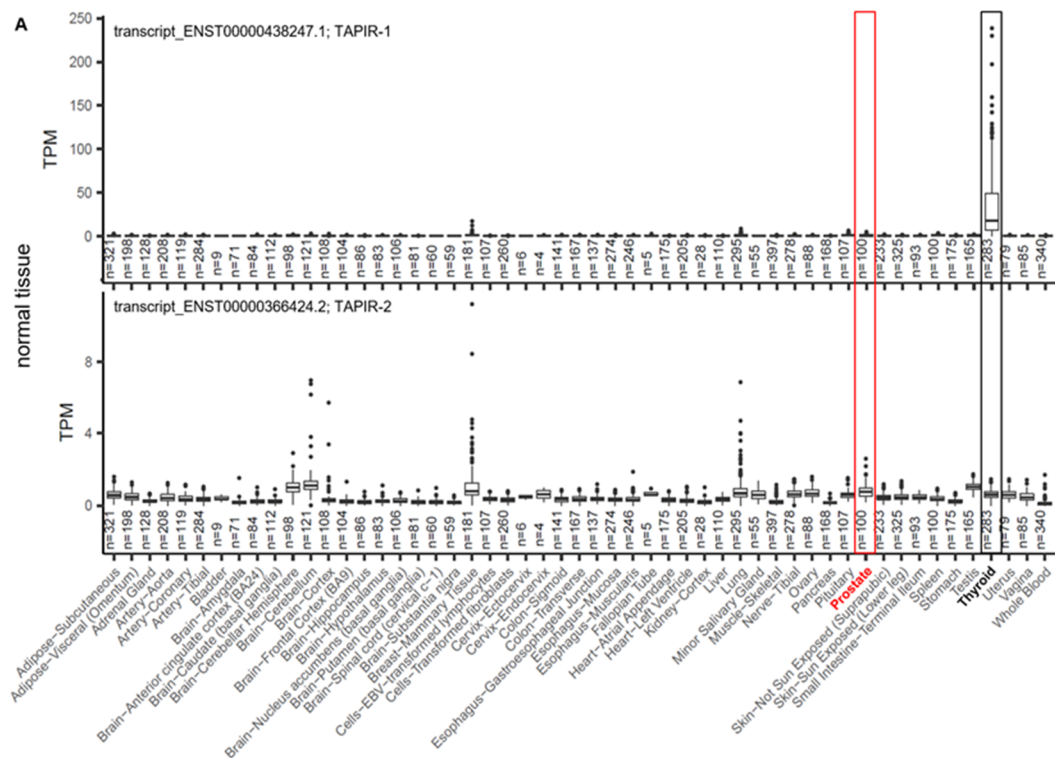

**Figure S4.** *TAPIR-1* and -2 expression is low in normal tissue. (A). Gene expression distribution for *TAPIR-1* (ENST00000438247.1) and *TAPIR-2* (AC144450.2, ENST00000366424.2) in normal tissues was analyzed from public transcriptome sequencing gene data analyses from 53 normal tissues (8555 samples; 570 donors) of the Genotype Tissue Expression (GTEx) project. Expression values are shown as TPM (Transcripts Per Million) calculated from a gene model with all isoforms collapsed to single genes. No other normalization steps have been applied. Box plots are shown as median and 25th and 75th percentiles. Prostate (red) and thyroid (black) tissue are marked by red and black box, respectively.

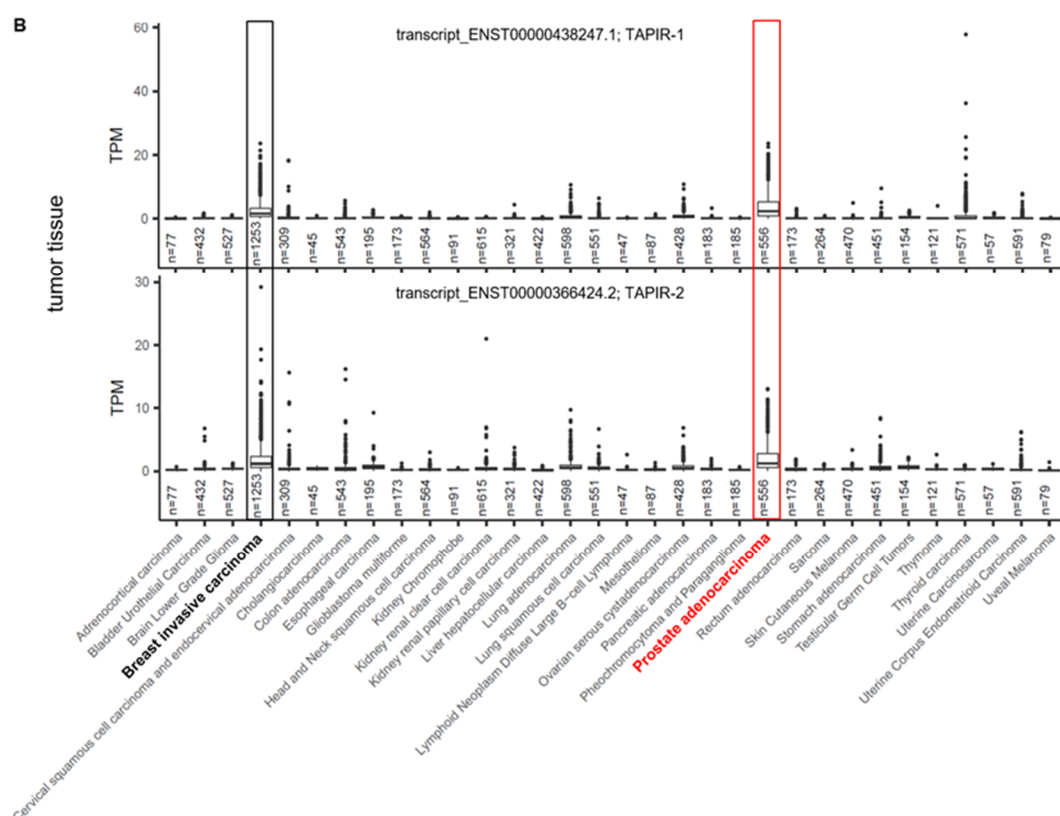

**Figure S5.** *TAPIR-1* and *-2* overexpression is restricted to tumor tissue. Gene expression distribution for *TAPIR-1* (ENST00000438247.1) and *TAPIR-2* (ENST00000366424.2) in cancer tissues were analyzed from RNA-seq expression data from 32 different tumor entities (11,133 samples) provided by the Cancer Genome Atlas (TCGA; <https://cancergenome.nih.gov/>). Expression values are shown in TPM calculated from gene model with isoforms collapsed to single genes. No other normalization steps have been applied. Box plots are shown as median and 25th and 75th percentiles. Prostate adenocarcinoma (red) and breast invasive carcinoma (black) specimens are marked by red and black box, respectively.



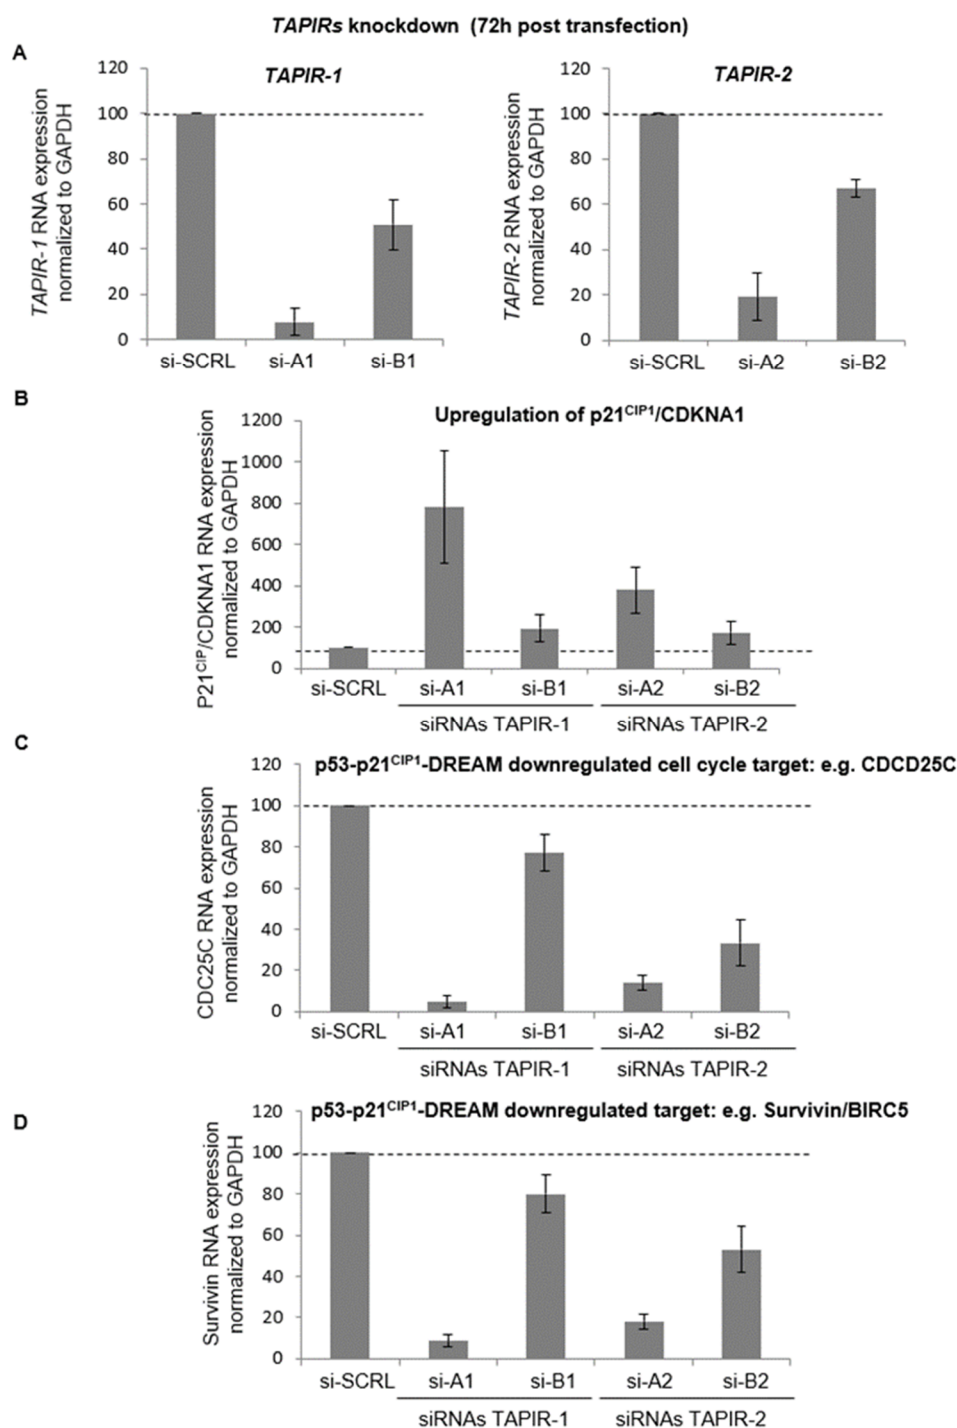

**Figure S6.** *TAPIRs* knockdown with 4 different *TAPIR*-directed siRNAs in LNCaP cells. Knockdown efficacy of two different *TAPIR-1* siRNAs (si-A1, si-B1) and two different *TAPIR-2* siRNAs (si-A2, si-B2) is shown 72h after transfection. RNA was isolated and reverse transcribed into cDNA. The expression levels of *TAPIR-1*, *TAPIR-2*, *CDC25C*, and *Survivin/BIRC-5* were determined by qPCR (normalized to *GAPDH*). Data represent the mean $\pm$ s.d. of at least n=3 biological replicates, measured in triplicate.

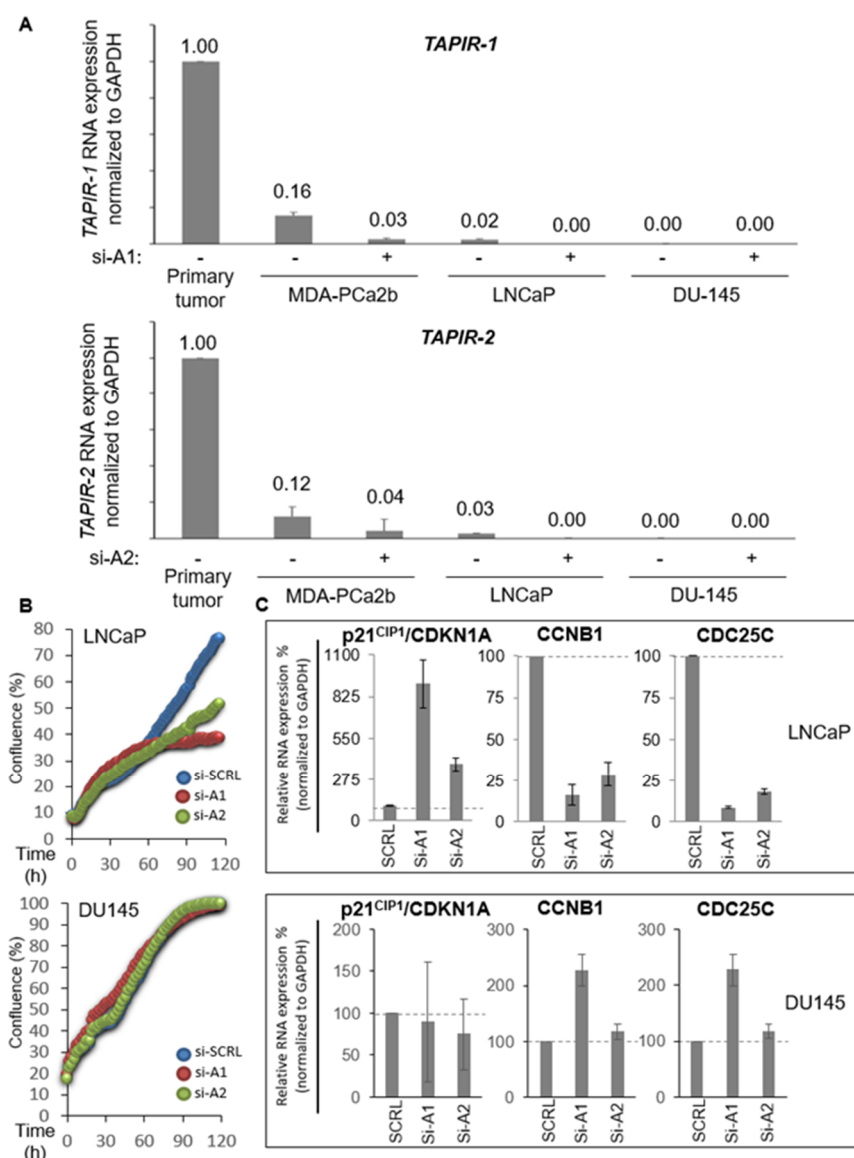

**Figure S7.** Comparison between primary tumors and cell lines and siRNA knockdown based phenotype of TAPIR lncRNAs positive and negative cells. (A) Expression pattern of TAPIR-1 and -2 and knockdown efficacy siRNAs (si-A1, si-B1) is shown 72h after transfection. The expression levels were normalized and compared to those of primary PCa tumor tissue. Experimentally, RNA was isolated, reverse transcribed into cDNA and the expression of *TAPIR-1*, and -2 were determined by qPCR (normalized to GAPDH) and compared to those of primary PCa tumor tissue. Data represent the mean  $\pm$  s.d. of at least  $n=3$  biological replicates, measured in triplicate. (B) IncuCyte live cell analysis. LNCaP- and DU145 cells were siRNA-transfected and seeded into ImageLock plates. Cells were grown for 6 days and monitored by time-lapse microscopy. The results of the IncuCyte experiments were quantified by cell confluency and shown as blue, red, and green filled circles indicating SCRL, si-A1, and si-A2, respectively. (C) Comparison of knockdown phenotype between LNCaP and DU145 cells. RNA was isolated from LNCaP- and DU145 cells, reverse transcribed into cDNA. The expression levels of p21<sup>CIP1</sup>/CDKN1A, CDC25C, and CCNB1 were determined by qPCR (normalized to GAPDH). Data represent the mean  $\pm$  s.d. of  $n=3$  biological replicates, measured in triplicate. Note, that DU145 cells do not express significant levels of TAPIR-1 and -2. Transfection of DU145 cells with TAPIR-specific siRNAs does not alter their proliferation and does not lead to an upregulation of p21<sup>CIP1</sup>/CDKN1A and a downregulation of cell cycle key regulators like CCNB1 and CDC25C.

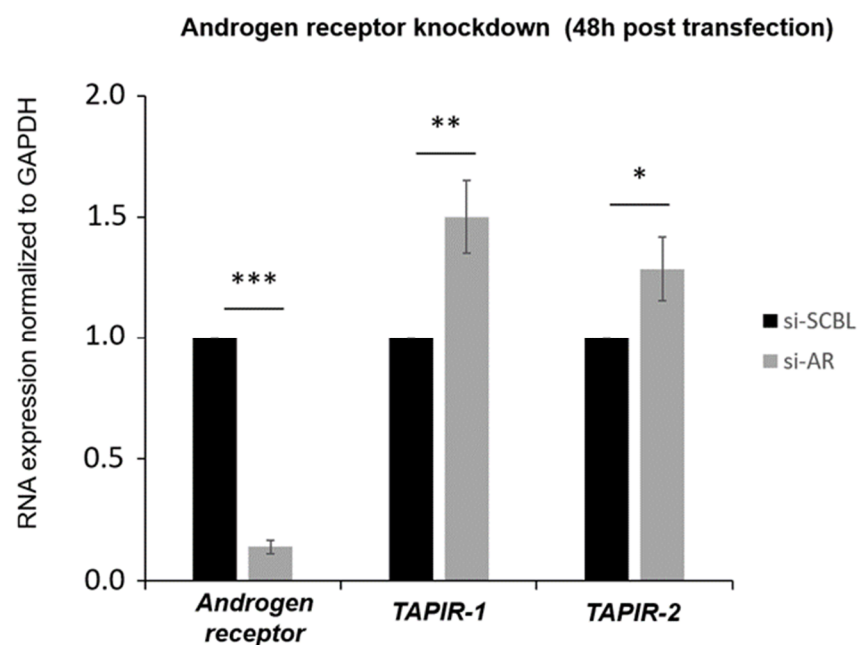

**Figure S8.** Expression pattern of *TAPIR-1* and -2 after androgen receptor knockdown. (A) LNCaP cells were cultured and treated with siRNA to knockdown androgen receptor (AR) and siRNA control (SCBL). Knockdown efficacy of siRNAs is shown 48h after transfection. RNA was isolated from cells and reverse transcribed into cDNA. The expression levels of AR, *TAPIR-1* and -2 were determined by qPCR and normalized to *GAPDH*. Data represent the mean $\pm$ s.d. of n=4 biological replicates. Significance  $p \leq 0.001$  (\*\*\*),  $p \leq 0.01$  (\*\*),  $p \leq 0.05$  (\*); student-t test.





### A Microarray pathway analysis; Cell cycle, Mitosis and Checkpoint genes 24h after *TAPIR-1* knockdown

| Gene      | logFC | pV  | Gene      | logFC | pV  | Gene      | logFC | pV  |
|-----------|-------|-----|-----------|-------|-----|-----------|-------|-----|
| CLSPN     | -3.8  | *** | CCND1     | -1.8  | *** | GTSE1     | -1.3  | *** |
| HIST1H1B  | -3.5  | *** | KNTC1     | -1.8  | *** | HIST1H2AM | -1.3  | **  |
| RRM2      | -3.1  | *** | CCNB2     | -1.8  | *** | RFC5      | -1.3  | *** |
| BRCA1     | -2.8  | *** | CDC42     | -1.8  | *** | HIST1H2AD | -1.3  | **  |
| ESCO2     | -2.8  | *** | CENPI     | -1.8  | *** | CENPL     | -1.3  | **  |
| PLK4      | -2.8  | *** | CHEK1     | -1.7  | *** | INCENP    | -1.3  | **  |
| ORC6      | -2.7  | *** | RFC3      | -1.7  | *** | CENPE     | -1.3  | **  |
| HIST1H3B  | -2.7  | *** | NCAPD2    | -1.7  | *** | SPDL1     | -1.3  | *** |
| CENPU     | -2.7  | *** | CENPA     | -1.7  | **  | RBL1      | -1.2  | **  |
| HIST1H2AI | -2.7  | *** | TOP2A     | -1.7  | *** | HIST1H2BI | -1.2  | **  |
| MCM10     | -2.6  | *** | AURKB     | -1.7  | *** | HIST1H4C  | -1.2  | **  |
| GINS2     | -2.6  | *** | CDC45     | -1.7  | **  | HIST1H1C  | -1.2  | **  |
| GINS3     | -2.5  | *** | HIST1H4L  | -1.7  | *** | CENPM     | -1.2  | *** |
| E2F1      | -2.5  | *** | HIST1H4B  | -1.6  | *** | CDC47L    | -1.2  | **  |
| ORC1      | -2.5  | *** | NCAPG     | -1.6  | *** | CDKN2C    | -1.2  | **  |
| BLM       | -2.4  | *** | H2AFV     | -1.6  | *** | HIST1H2BM | -1.2  | **  |
| NDC80     | -2.4  | **  | SMC2      | -1.6  | **  | HIST1H2AG | -1.2  | **  |
| DSN1      | -2.4  | *** | MCM2      | -1.6  | *** | HIST1H2BL | -1.2  | **  |
| CDC47     | -2.4  | *** | RFC4      | -1.6  | *** | HIST1H2BH | -1.2  | **  |
| HIST1H3F  | -2.4  | *** | NUF2      | -1.6  | *** | SPC24     | -1.2  | **  |
| EXO1      | -2.3  | *** | TYMS      | -1.6  | *** | TK1       | -1.1  | **  |
| HIST1H3D  | -2.3  | *** | HIST1H4H  | -1.6  | *** | CENPJ     | -1.1  | **  |
| E2F2      | -2.2  | **  | CDK2      | -1.6  | **  | HIST1H2BC | -1.1  | **  |
| KNL1      | -2.2  | *** | CENPQ     | -1.6  | *** | KIF2C     | -1.1  | *** |
| NCAPG2    | -2.2  | *** | CCNE2     | -1.6  | *** | HIST1H2AB | -1.1  | **  |
| HIST1H3J  | -2.2  | *** | PRIM2     | -1.6  | **  | TPX2      | -1.1  | **  |
| MCM5      | -2.1  | *** | KIF23     | -1.6  | *** | KIF20A    | -1.1  | **  |
| HIST1H3I  | -2.1  | *** | MCM6      | -1.5  | *** | PLK1      | -1.1  | **  |
| HIST1H3H  | -2.1  | *** | HIST1H1E  | -1.5  | **  | AURKA     | -1.1  | **  |
| HIST1H3E  | -2.1  | *** | HIST1H2BI | -1.5  | *** | SMC1A     | -1.0  | **  |
| SKP2      | -2.1  | *** | CDT1      | -1.5  | *** | BRMS1     | -0.9  | **  |
| BIRC5     | -2.1  | *** | HIST1H2AE | -1.5  | *** | MASTL     | -0.9  | **  |
| POLE2     | -2.1  | *** | MCM3      | -1.4  | *** | DYNLL2    | -0.8  | **  |
| MCM4      | -2.0  | *** | CDC48     | -1.4  | *** | E2F5      | 1.2   | **  |
| HIST1H4F  | -2.0  | *** | VRK1      | -1.4  | **  |           |       |     |
| HIST1H4D  | -2.0  | *** | HIST1H2BB | -1.4  | **  |           |       |     |
| ZWINT     | -2.0  | *** | SMC4      | -1.4  | *** |           |       |     |
| HIST1H2AJ | -2.0  | *** | HIST1H2BG | -1.4  | *** |           |       |     |
| HIST1H3G  | -1.9  | *** | CCNA2     | -1.4  | *** |           |       |     |
| BUB1B     | -1.9  | *** | PCNA      | -1.4  | *** |           |       |     |
| SGO1      | -1.9  | **  | CENPF     | -1.4  | **  |           |       |     |
| HIST1H2AK | -1.9  | *** | RMI2      | -1.3  | *** |           |       |     |
| HIST1H4I  | -1.9  | *** | CENPO     | -1.3  | *** |           |       |     |
| H2AFX     | -1.9  | *** | MCM7      | 1.3   | *** |           |       |     |

### B Microarray KEGG pathway analysis

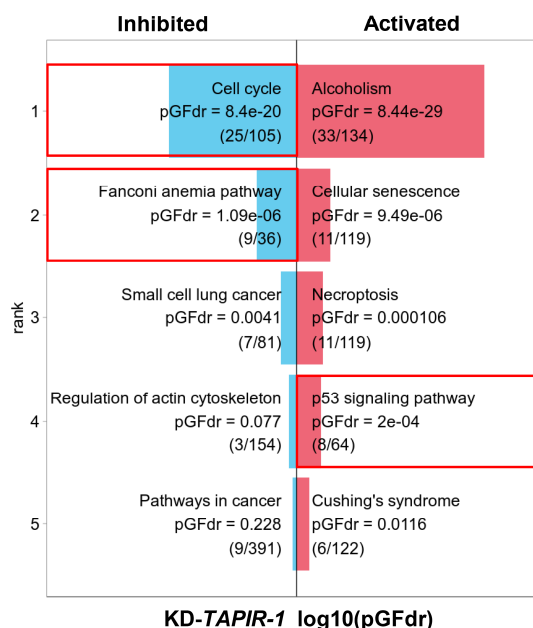

### C Microarray heatmap

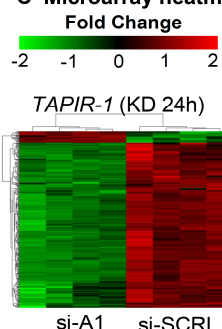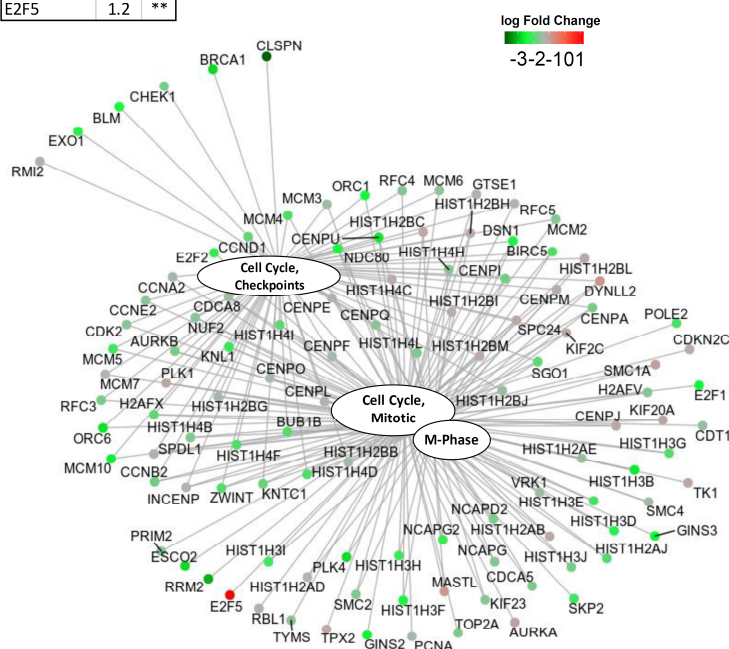

**Figure S10.** Increase in p53 levels and downregulation of cell cycle - and DNA repair control genes following *TAPIR-1* knockdown. (A) Differential mRNA expression following *TAPIR-1* knockdown. A microarray analysis was performed 24h after *TAPIR-1* and -2 knockdowns. Data were analyzed and visualized using ReactomePA tool software to identify regulated target genes and cellular processes. An enlarged version of the graph is provided as supplemental Figure 11. ReactomePA is a pathway database tool used for the visualization, interpretation and analysis of regulated pathways. A table shows all cell cycle, mitosis and checkpoint regulated

genes 24 hours after *TAPIR-1* knockdown. Notably, this table includes 122 of the in total 317 significantly regulated genes. Adjusted p-values are given as  $p \leq 0.01$  (\*\*),  $p \leq 0.001$  (\*\*\*). Regulatory interactions are visualized by the function `cnetplot()` of the ReactomePA package. Downregulated genes are shown in green, upregulated genes in red. Shown are the identified regulated genes of the four most regulated cellular processes: cell cycle, mitotic, m-phase, and cell cycle checkpoints. Interactions of molecules are indicated by black lines. (B) Heatmap of differentially up- and down-regulated *TAPIR-1* target genes 24h post siRNA transfection determined by microarray analysis (performed in quadruplicate). Significant upregulated genes are shown in red, downregulated genes in green. Note that ~95% of the targets are downregulated. (C) Microarray signaling pathway impact analysis (SPIA). Transcriptome wide RNA expression patterns of siRNA treated LNCaP cells (each experiment was performed in quadruplicate) were measured by custom made microarray 24h after transfection. The biological pathways extraction was done by the use of Kyoto Encyclopedia of Genes and Genomes (KEGG) PATHWAY database. Downregulation of cell cycle and Fanconi anemia pathway genes (left red boxes) and upregulation of p53 signaling pathway (right red box) is shown. The false discovery rate-adjusted global probability (pGFdr) is given.

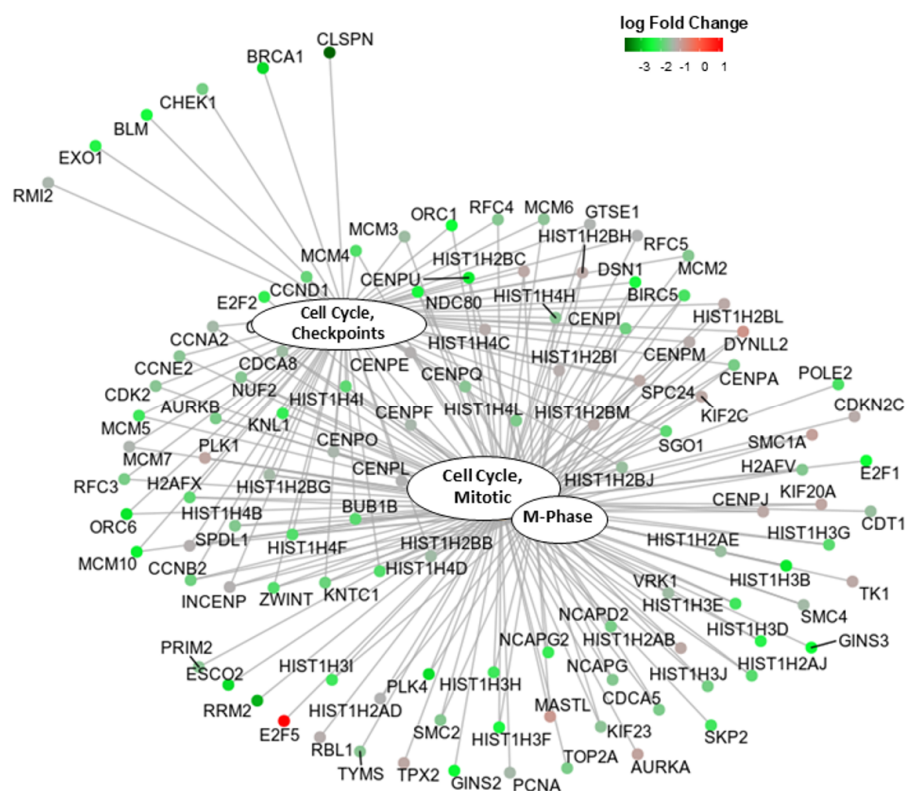

**Figure S11.** Enlarge graph of the ReactomePA pathway analysis of supplemental Figure 9

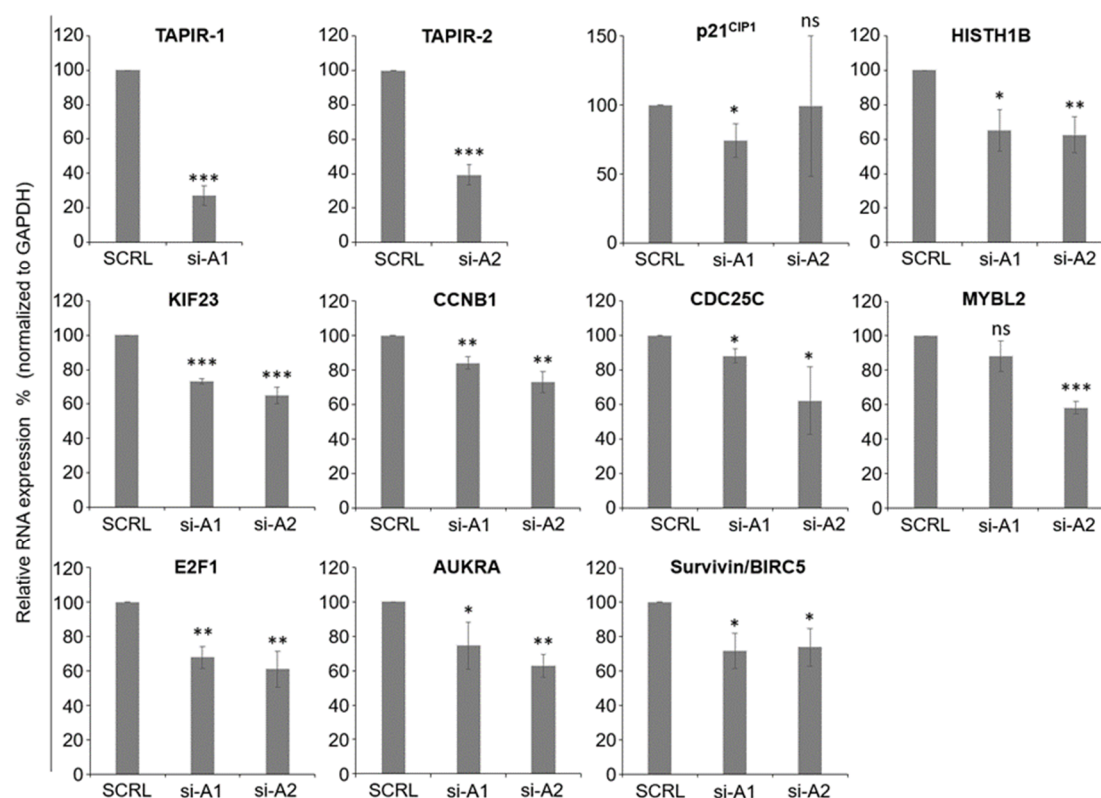

**Figure S12.** Validation of cell cycle regulating target genes after *TAPIR-1* and *-2* knockdown by qPCR. Total RNA was isolated from MDA-PCa2b cells 72h post siRNA transfection and reverse transcribed into cDNA. qPCR was performed to quantify *TAPIR-1*, *TAPIR-2*, p21<sup>CIP1</sup>/CDKN1A, *CCNB1*, *KIF23*, *MYBL2*, *CDC25C*, *AURKA*, *HISTH1B*, *E2F1*, Survivin/*BIRC5*. The  $\Delta C_t$  values were determined by subtracting  $C_t$  value of housekeeper  $C_t$  value (GAPDH). Data are shown as means  $\pm$  s.d.; Significance  $p \leq 0.05$  (\*),  $p \leq 0.01$  (\*\*),  $p \leq 0.001$  (\*\*\*), ns = not significant; two-sided student-t test.

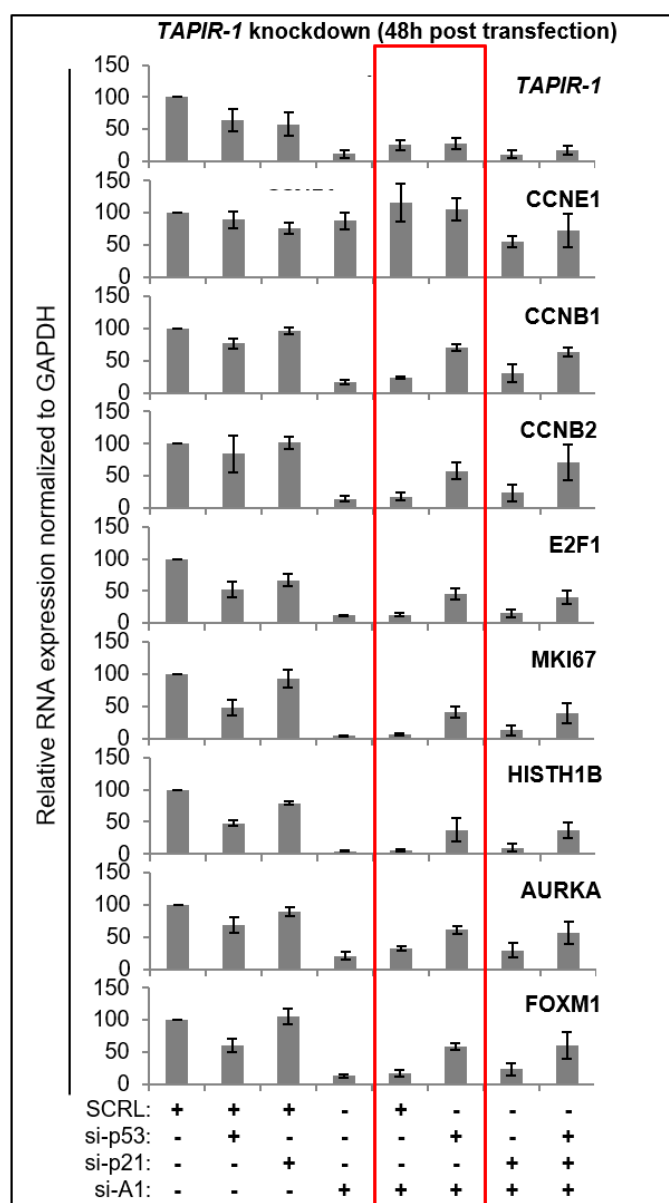

**Figure S13.** Gene expression alterations after knockdown of p53 or *TAPIR-1* 48h post siRNA transfection. LNCaP cells were transfected with siRNAs against *TAPIR-1*, p53/TP53, p21<sup>CIP1</sup>/CDKN1A, scrambled control (and combinations) and cultured for 48h. Results of qPCR analysis of *TAPIR-1*, CCNE1, CCNB1, CCNB2, E2F1, MKI67, HISTH1B, AURKA and FOXM1 are shown. The  $\Delta C_t$  values were determined by subtracting  $C_t$  value of housekeeper  $C_t$  value (GAPDH). Each qPCR reaction was performed in triplicate at least with three independent biological replicates. Data are shown as means  $\pm$  s.d..

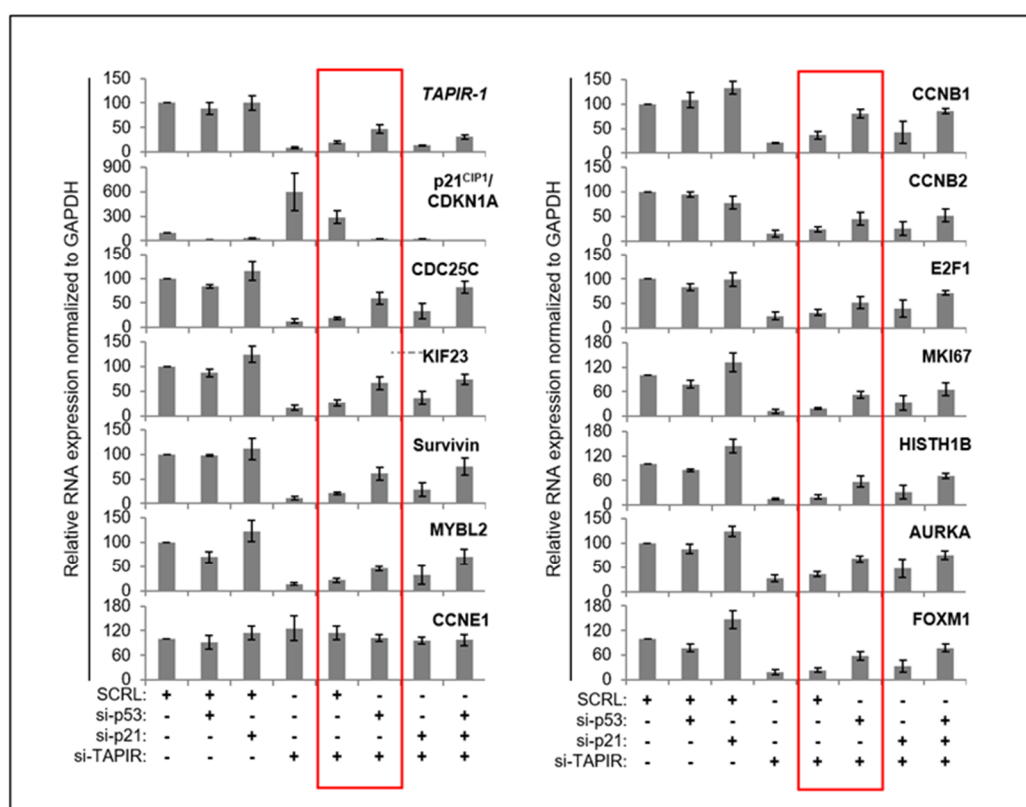

**Figure S14.** Gene expression alterations after knockdown of p53 or *TAPIR-1* 72h post siRNA transfection. LNCaP cells were transfected siRNA against *TAPIR-1*, p53/TP53, p21<sup>CIP1</sup>/CDKN1A, scramble control (and combinations) and cultured for 72h. Results of qPCR analysis of *TAPIR-1*, p21<sup>CIP1</sup>/CDKN1A, CDC25C, KIF23, Survivin/BIRC-5, MYBL2, CCNE1, CCNB1, CCNB2, E2F1, MKI67, HISTH1B, AURKA and FOXM1 are shown. The  $\Delta C_t$  values were determined by subtracting  $C_t$  value of housekeeper  $C_t$  value (GAPDH). Each qPCR reaction was performed in triplicate at least with three independent biological replicates. Data are shown as means  $\pm$  s.d.

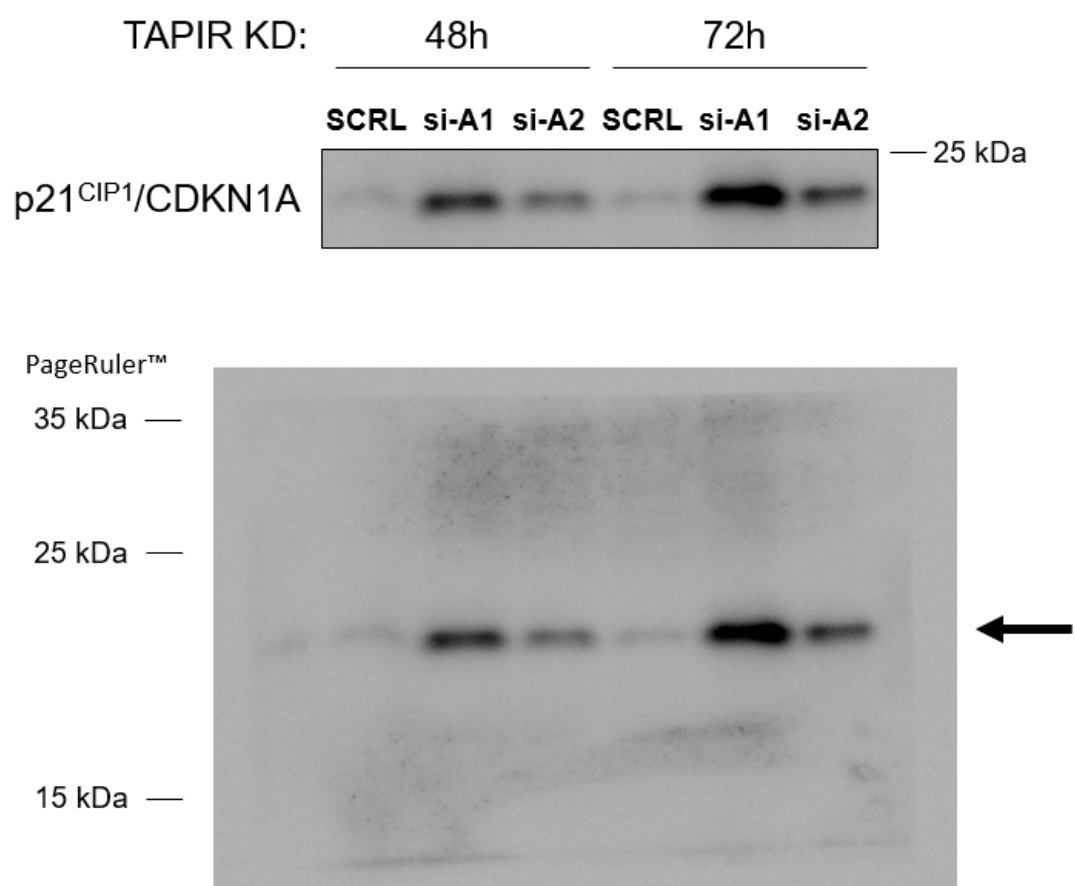

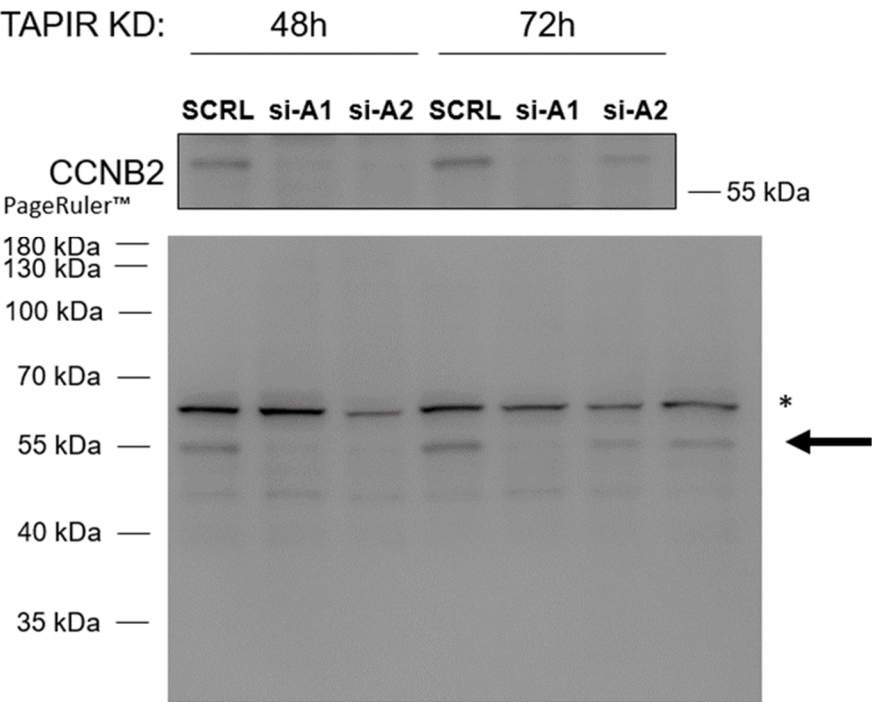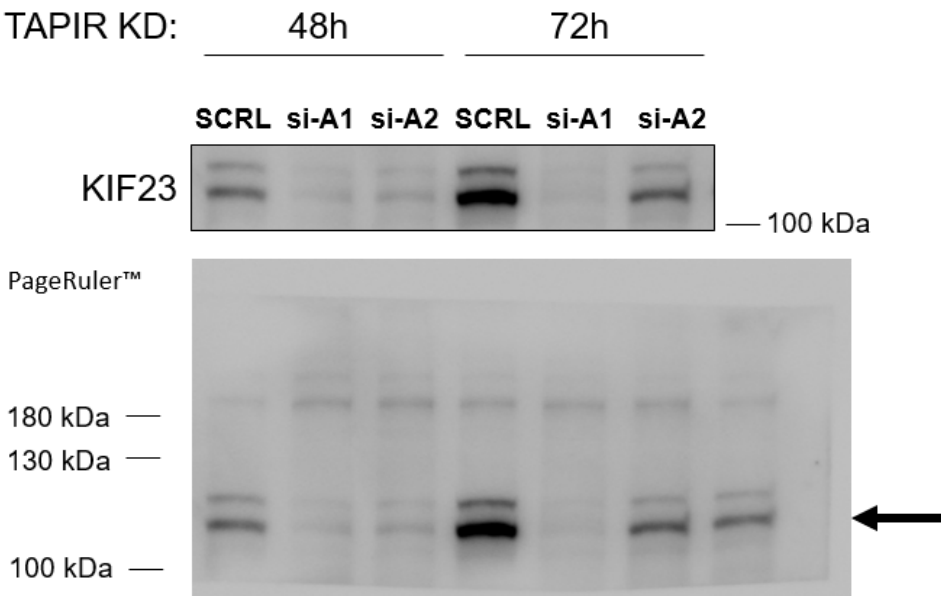



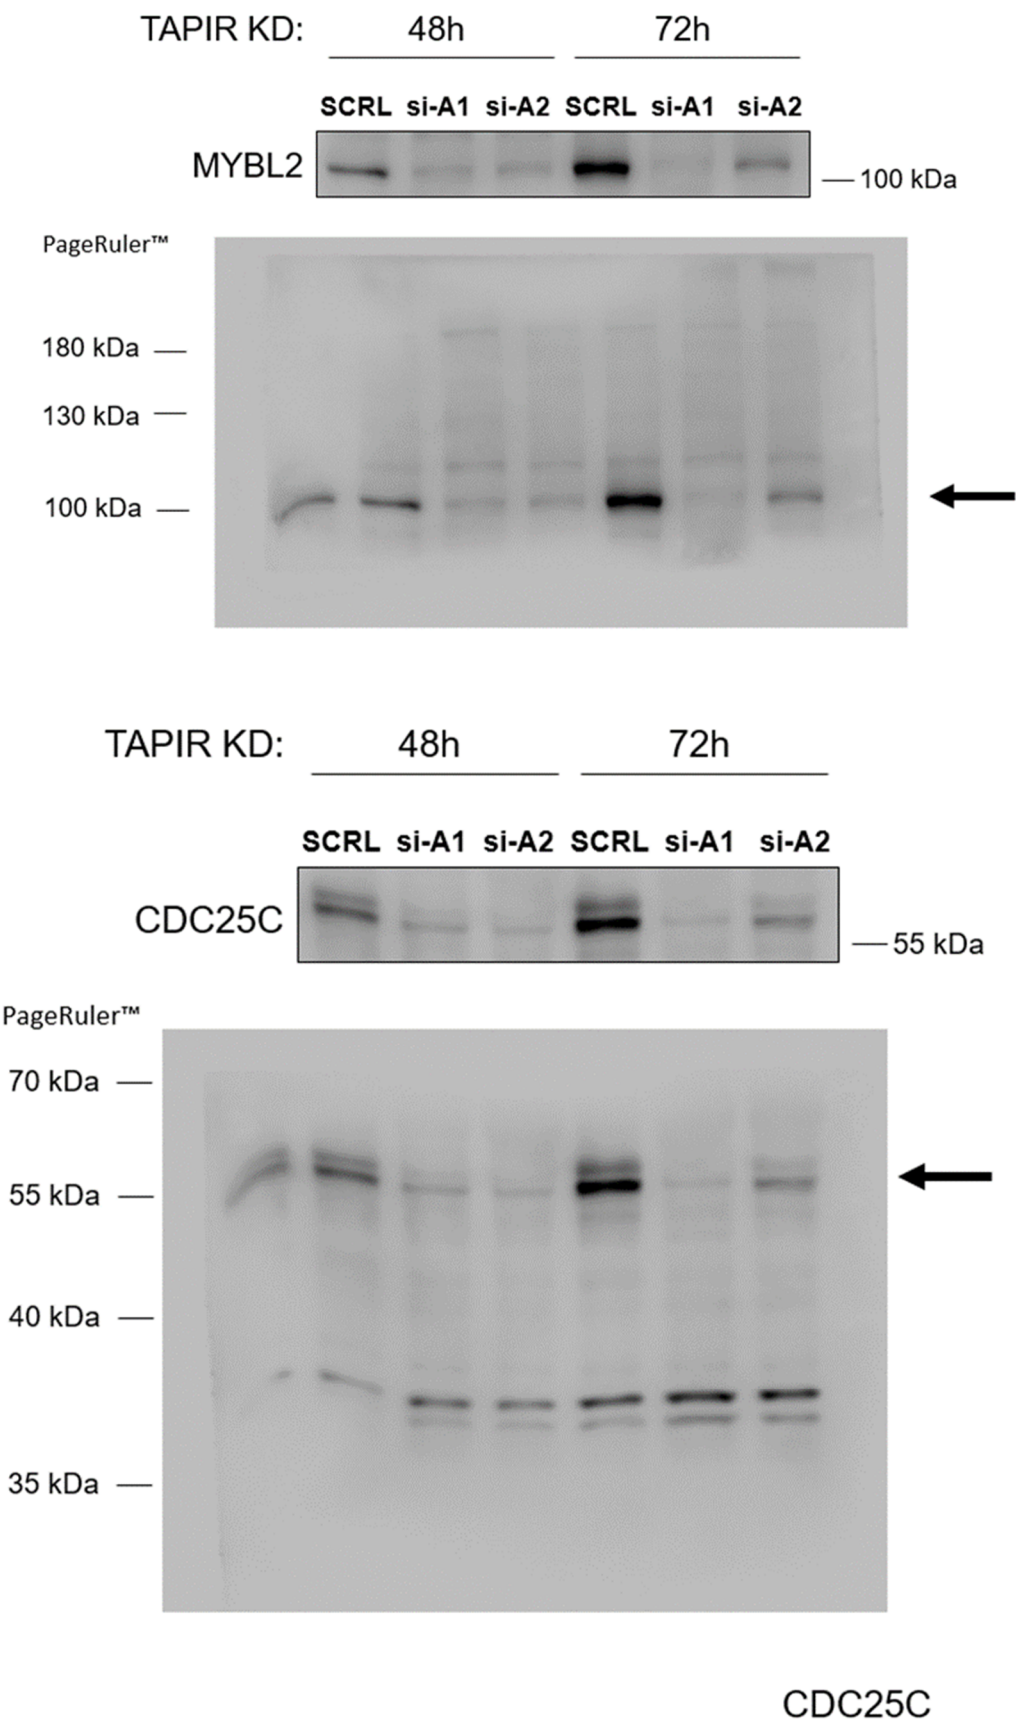



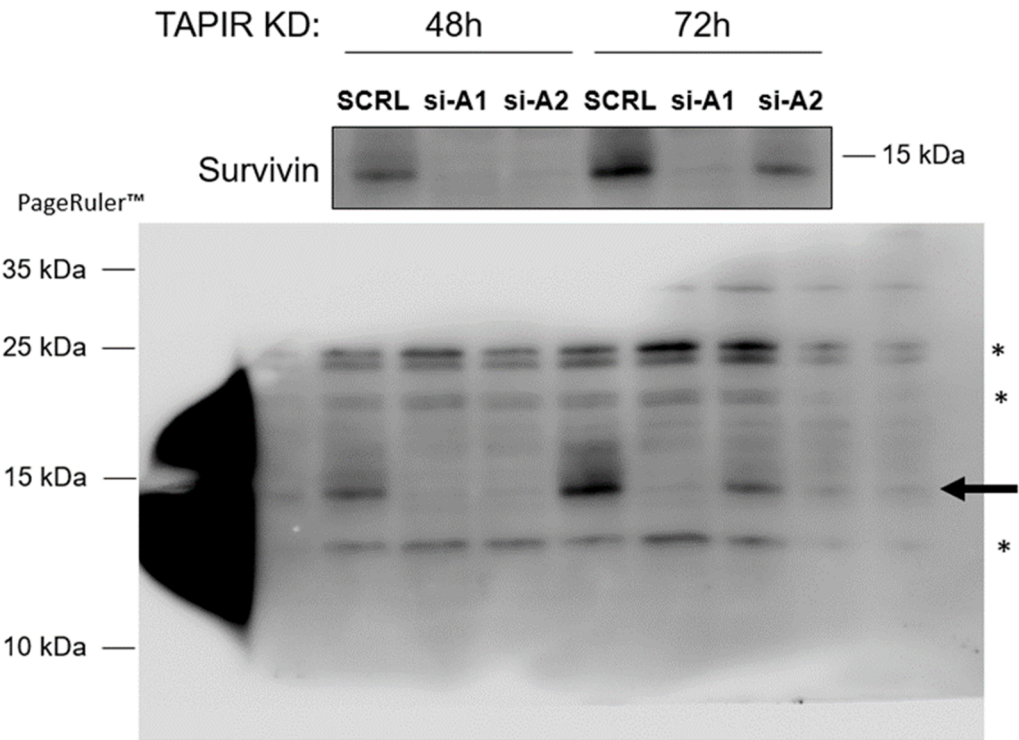

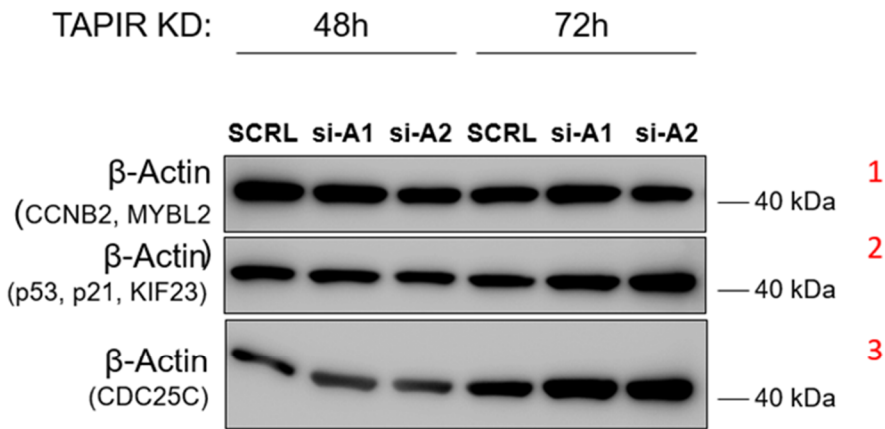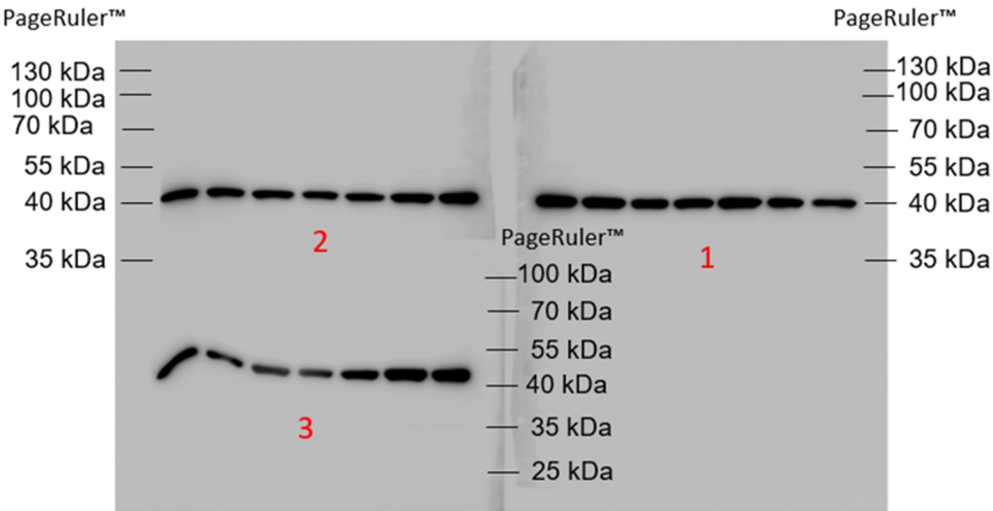

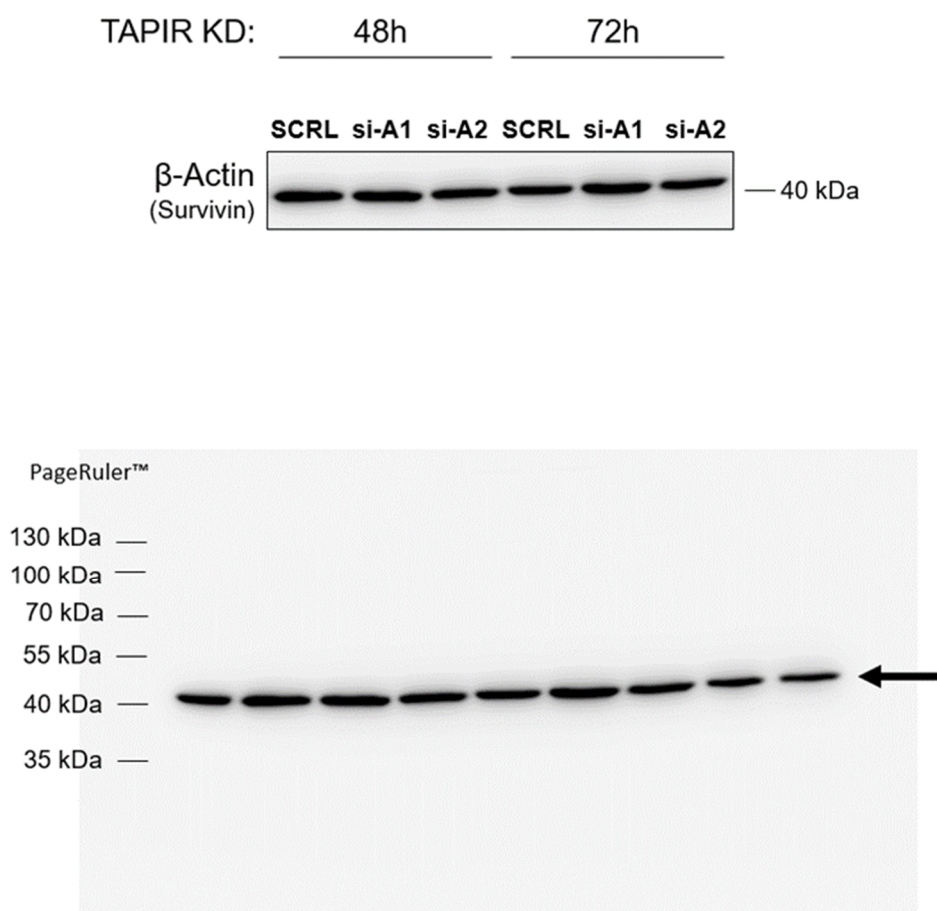

Uncropped western blot images of *TAPIR-1* target gene protein expression is shown. Cropped images (lanes) focusing on the specific protein are presented in **Figure 5c**.

**Figure S15. Uncropped western blot images**

Uncropped western blot images of *TAPIR-1* and *-2* target gene protein expression are shown. Cropped images (lanes) focusing on the specific protein are presented in **Figure 5a**.

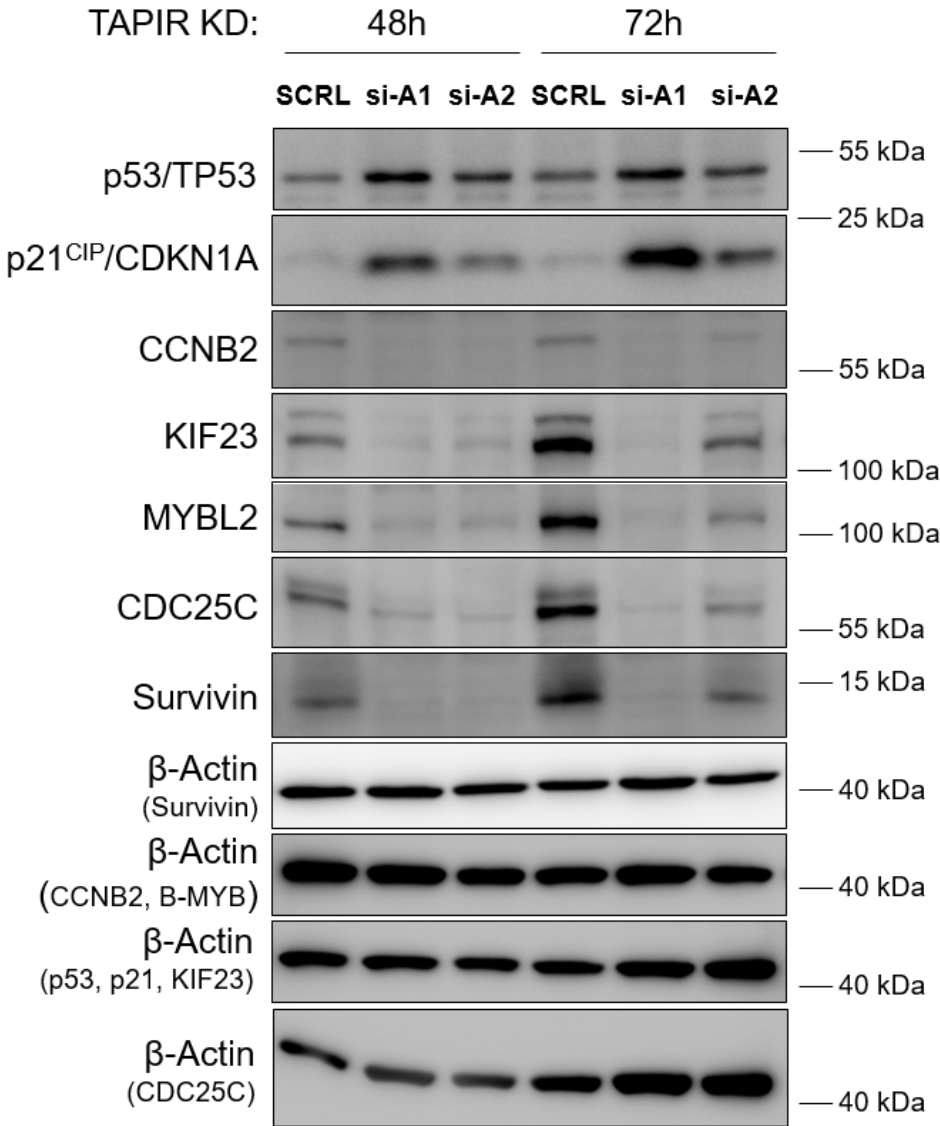

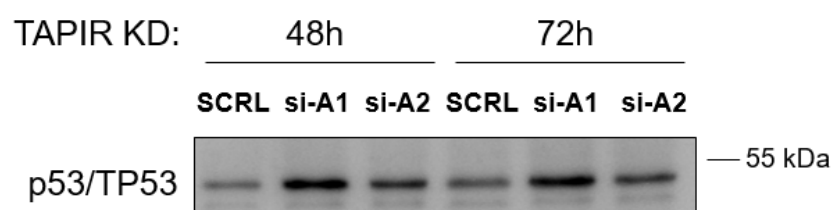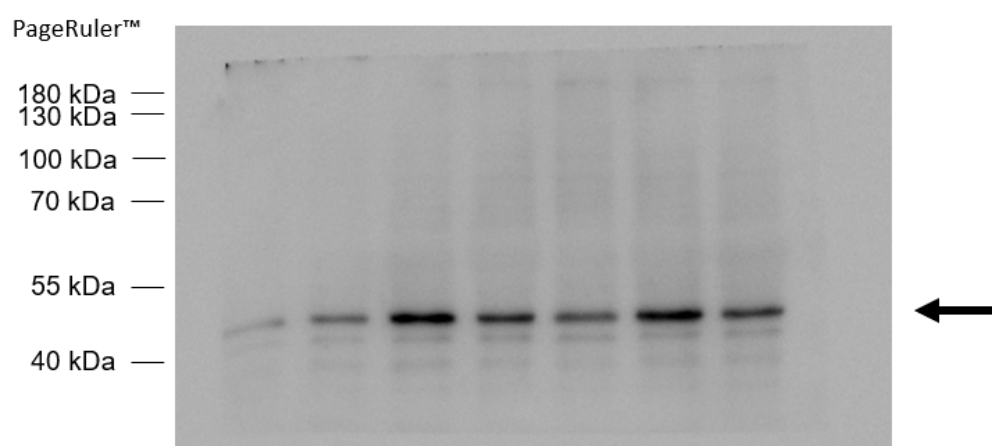

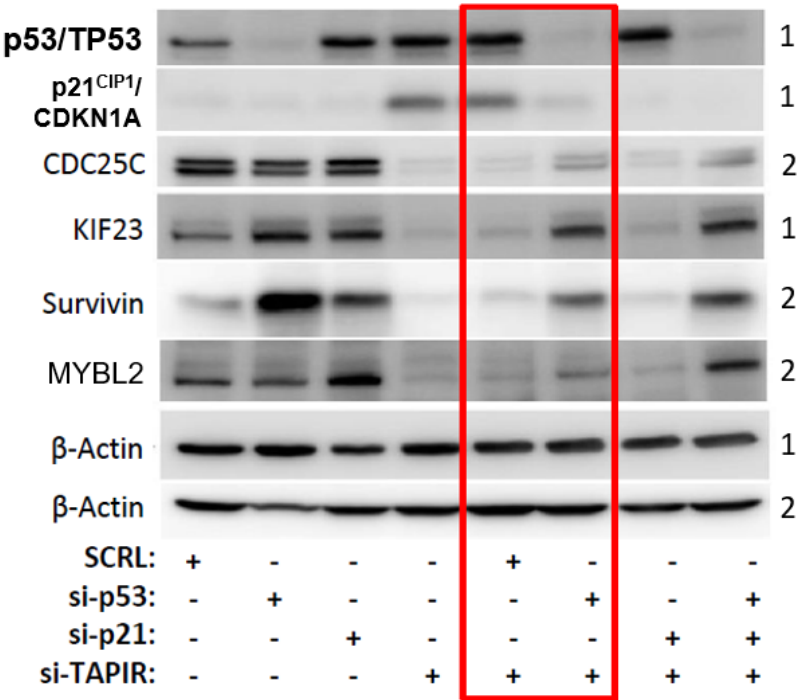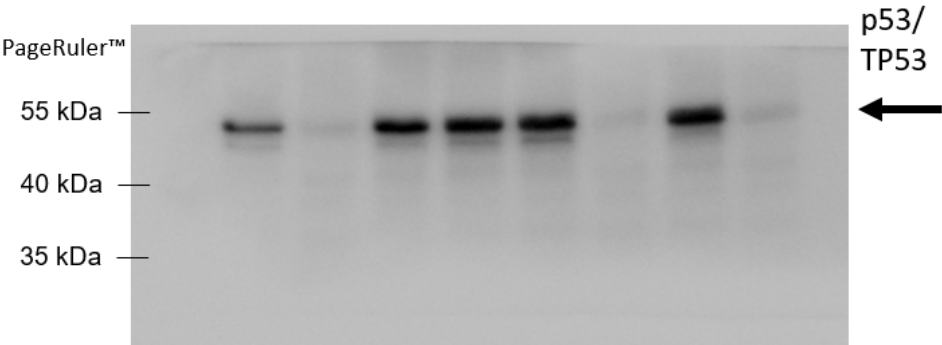

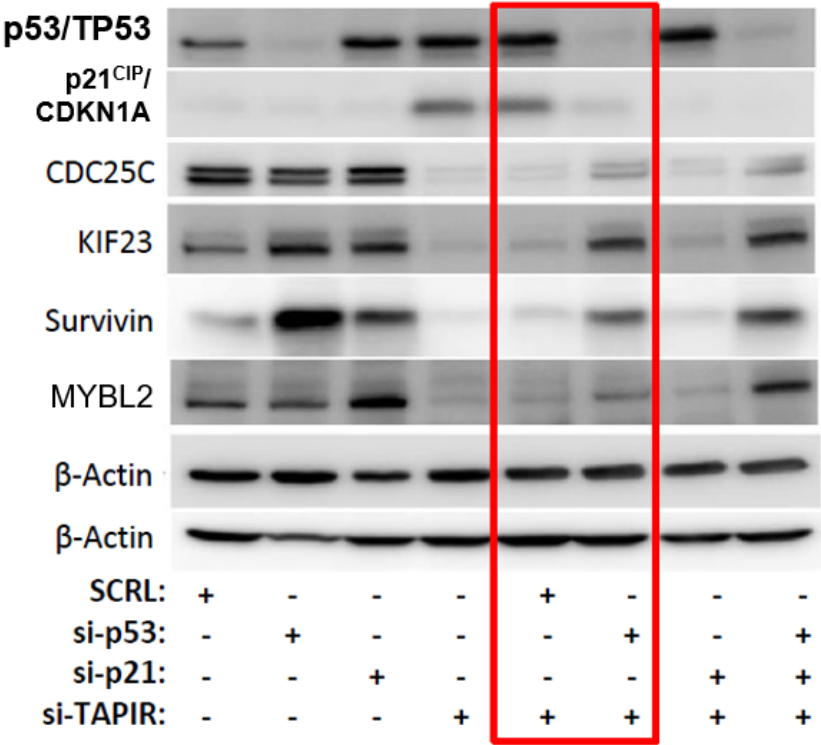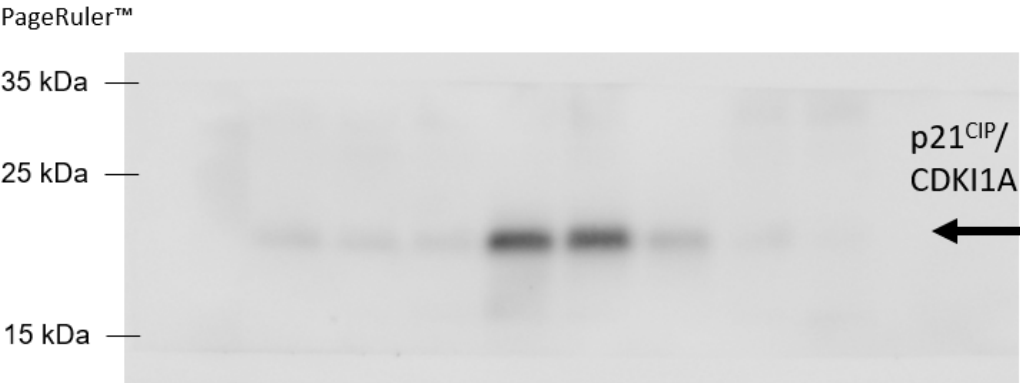

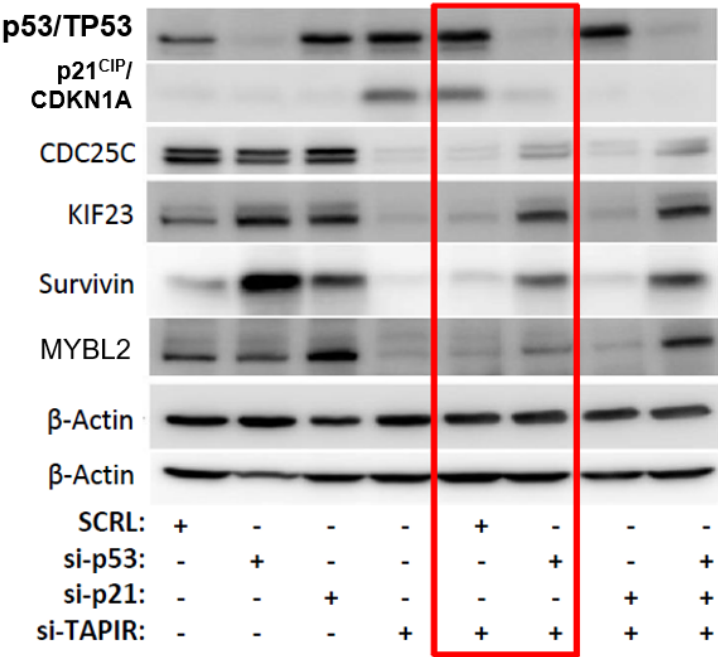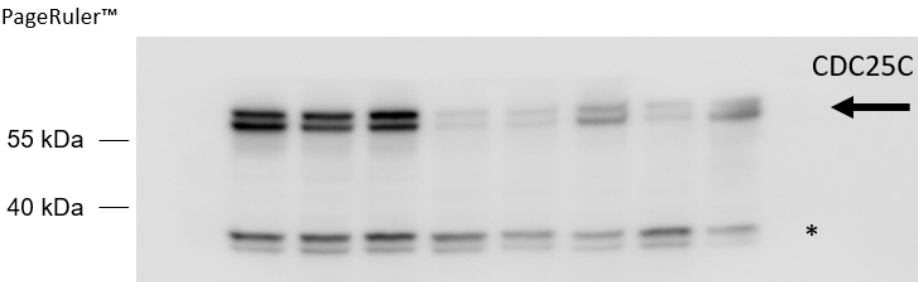



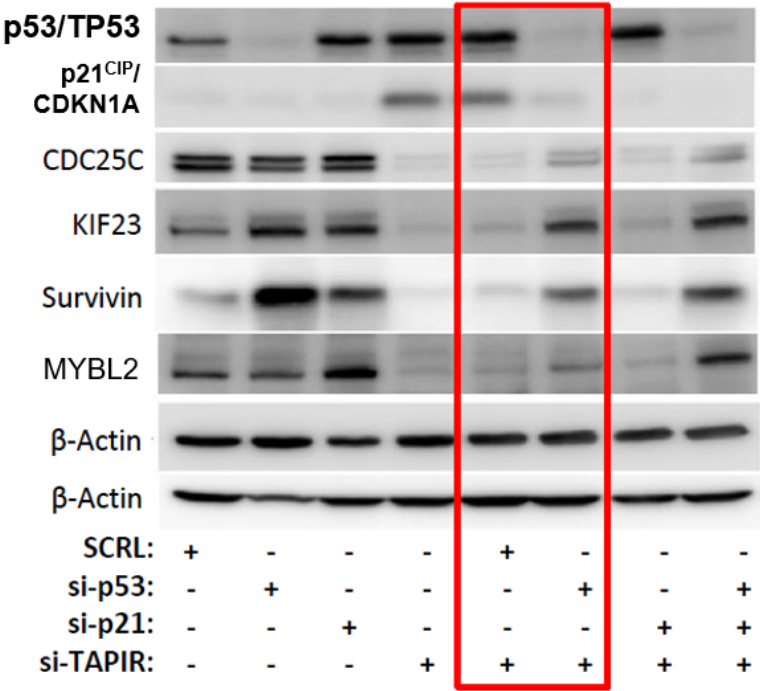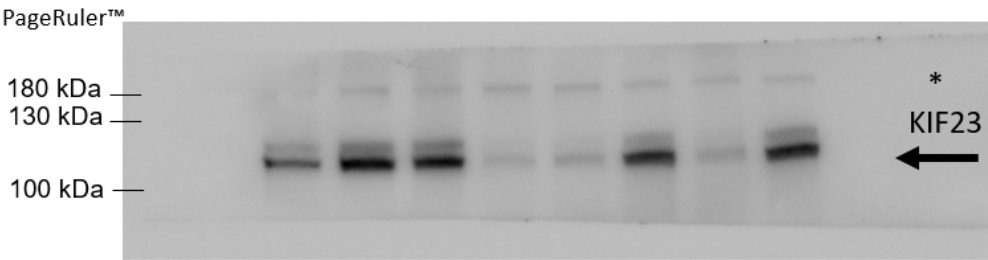

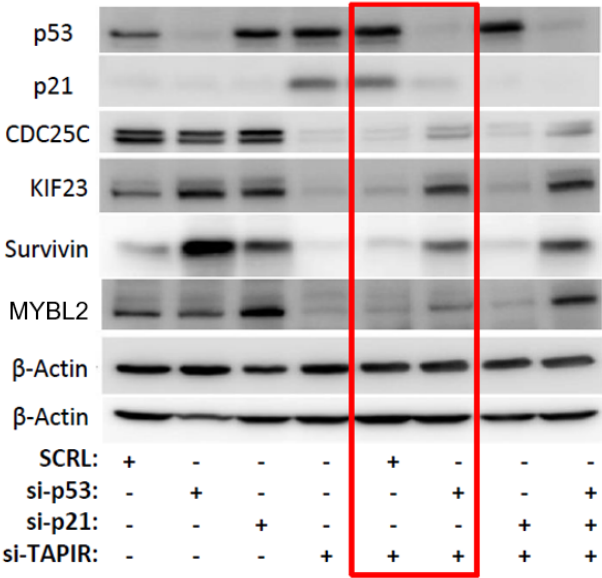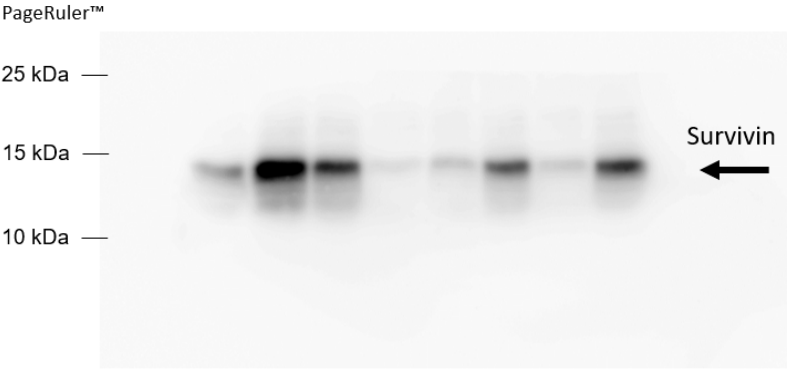

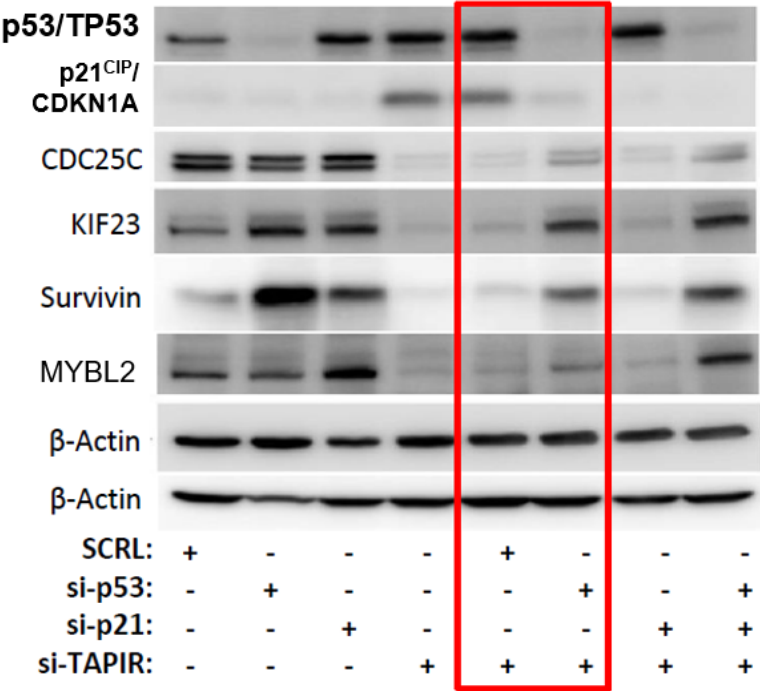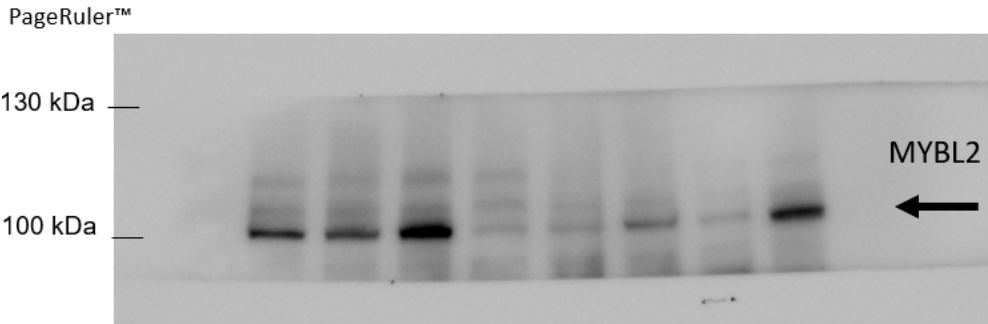

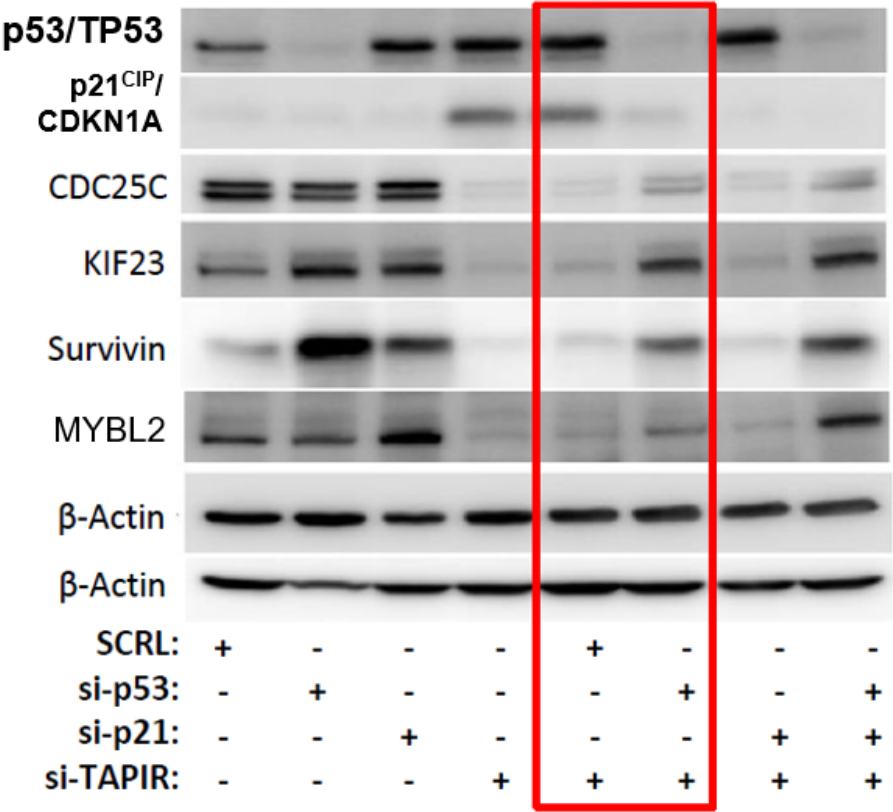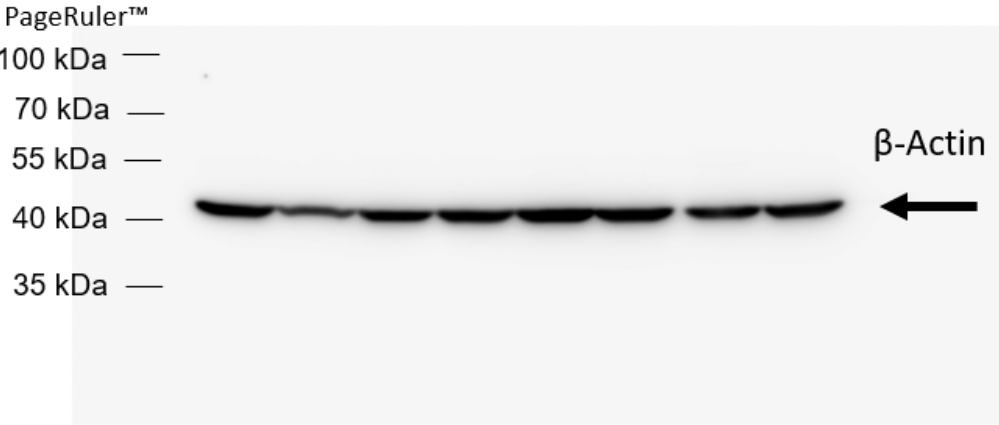

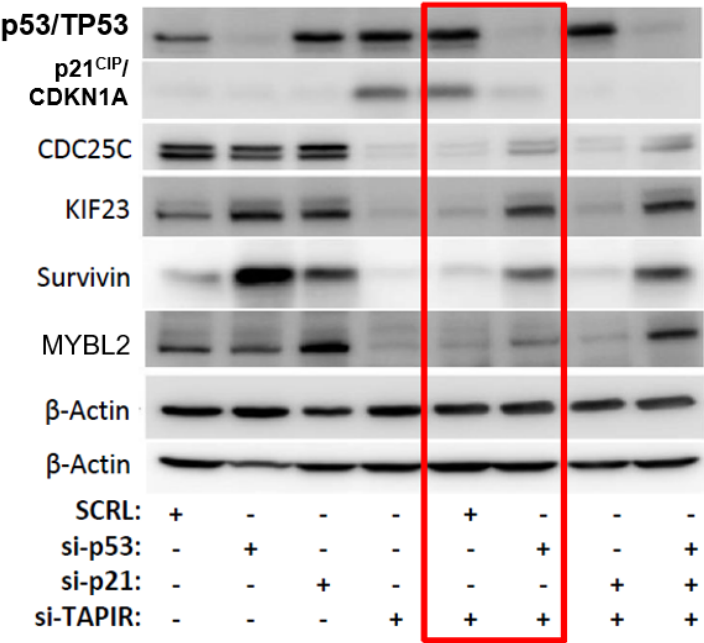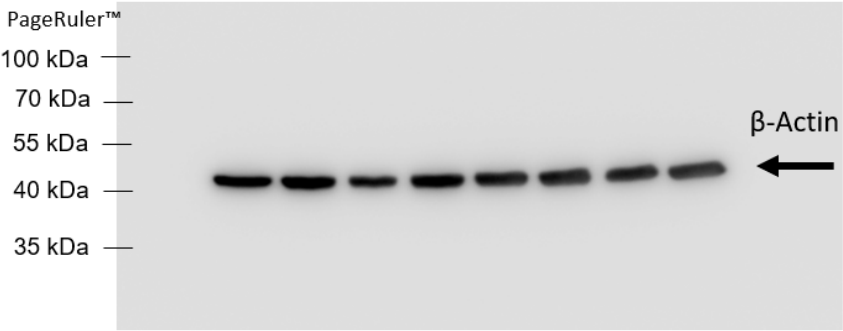

**Table S1.** Coding potential prediction of TAPIR-1 and -2 represent non-coding used Coding-Potential Assessment Tool (CPAT).

| Name           | Sequence ID       | RNA size | ORF size | Ficket Score | Hexamer Score | Coding Probability* | Coding Label |
|----------------|-------------------|----------|----------|--------------|---------------|---------------------|--------------|
| <i>TAPIR-1</i> | ENST00000438247.1 | 786      | 129      | 0.5615       | -0.1234       | 0.003               | No           |
| <i>TAPIR-2</i> | ENST00000366424.2 | 1641     | 339      | 0.8079       | -0.0895       | 0.070               | No           |

\* Based on ORF size, ORF coverage, Fickett TESTCODE statistic, and hexamer usage bias a coding probability below cutoff 0.364 denotes none coding transcripts.

**Table S2.** Biological Process; GO Term Enrichment analyses of siRNA knockdown experiments in LNCaP cells. Shown are the results (Top 10 table) of si-A1 (*TAPIR-1*) - vs SCBT siRNA treatment 24h post transfection. Graph: Graph: Biological Process; GO Term Enrichment analyses of siRNA knockdown experiments in LNCaP cells. Shown are the results (Top 10 table) of si-A1 (*TAPIR-1*) - vs SCBT siRNA treatment 24h post transfection.

| GO.ID                      | Term                       | Annotated | Significant | Expected | classicFisher | Adj. p-value |
|----------------------------|----------------------------|-----------|-------------|----------|---------------|--------------|
| <a href="#">GO:0051276</a> | chromosome organization    | 1043      | 123         | 20.54    | 1.36e-65      | 2.08e-61     |
| <a href="#">GO:0007049</a> | cell cycle                 | 1584      | 135         | 31.19    | 2.44e-55      | 1.87e-51     |
| <a href="#">GO:0022402</a> | cell cycle process         | 1151      | 114         | 22.67    | 5.96e-52      | 3.04e-48     |
| <a href="#">GO:1903047</a> | mitotic cell cycle process | 718       | 92          | 14.14    | 2.05e-50      | 7.85e-47     |
| <a href="#">GO:0000278</a> | mitotic cell cycle         | 869       | 98          | 17.11    | 7.21e-49      | 2.21e-45     |
| <a href="#">GO:0071103</a> | DNA conformation change    | 230       | 56          | 4.53     | 1.11e-45      | 2.84e-42     |
| <a href="#">GO:0006323</a> | DNA packaging              | 163       | 48          | 3.21     | 1.84e-43      | 4.03e-40     |
| <a href="#">GO:0007059</a> | chromosome segregation     | 299       | 58          | 5.89     | 2.58e-41      | 4.94e-38     |
| <a href="#">GO:0006334</a> | nucleosome assembly        | 110       | 40          | 2.17     | 1.78e-40      | 3.02e-37     |
| <a href="#">GO:0031497</a> | chromatin assembly         | 124       | 41          | 2.44     | 1.71e-39      | 2.62e-36     |

**Table S3.** Molecular Function; GO Term Enrichment analyses of siRNA knockdown experiments in LNCaP cells. Shown are the results (Top 10 table) of si-A1 (*TAPIR-1*) - vs SCBT siRNA treatment 24h post transfection. Molecular Function; GO Term Enrichment analyses of siRNA knockdown experiments in LNCaP cells. Shown are the results (Top 10 table) of si-A1 (*TAPIR-1*) - vs SCBT siRNA treatment 24h post transfection.

| GO.ID                      | Term                                | Annotated | Significant | Expected | classicFisher | Adj. p-value |
|----------------------------|-------------------------------------|-----------|-------------|----------|---------------|--------------|
| <a href="#">GO:0046982</a> | protein heterodimerization activity | 426       | 41          | 8.43     | 2.92e-17      | 1.29e-13     |
| <a href="#">GO:0003677</a> | DNA binding                         | 2189      | 95          | 43.33    | 1.13e-14      | 2.50e-11     |
| <a href="#">GO:0003682</a> | chromatin binding                   | 475       | 36          | 9.40     | 4.11e-12      | 6.07e-09     |
| <a href="#">GO:0005515</a> | protein binding                     | 9872      | 244         | 195.41   | 2.76e-11      | 3.05e-08     |
| <a href="#">GO:0046983</a> | protein dimerization activity       | 1125      | 52          | 22.27    | 6.36e-09      | 5.64e-06     |
| <a href="#">GO:0031492</a> | nucleosomal DNA binding             | 33        | 9           | 0.65     | 1.05e-08      | 7.73e-06     |
| <a href="#">GO:0140097</a> | catalytic activity, acting on DNA   | 162       | 17          | 3.21     | 2.24e-08      | 1.23e-05     |
| <a href="#">GO:0042393</a> | histone binding                     | 163       | 17          | 3.23     | 2.45e-08      | 1.23e-05     |
| <a href="#">GO:1901363</a> | heterocyclic compound binding       | 5002      | 144         | 99.01    | 2.56e-08      | 1.23e-05     |
| <a href="#">GO:0035173</a> | histone kinase activity             | 18        | 7           | 0.36     | 2.92e-08      | 1.23e-05     |

**Table S4.** Cellular Compartment; GO Term Enrichment analyses of siRNA knockdown experiments in LNCaP cells. Shown are the results (Top 10 table) of si-A1 (TAPIR-1) - vs SCBT siRNA treatment 24h post transfection. Cellular Compartment; GO Term Enrichment analyses of siRNA knockdown experiments in LNCaP cells. Shown are the results (Top 10 table) of si-A1 (TAPIR-1) - vs SCBT siRNA treatment 24h post transfection.

| GO.ID                      | Term                                         | Annotated | Significant | Expected | classicFisher | Adj. p-value |
|----------------------------|----------------------------------------------|-----------|-------------|----------|---------------|--------------|
| <a href="#">GO:0005694</a> | Chromosome                                   | 864       | 124         | 16.44    | 5.25e-78      | 9.98e-75     |
| <a href="#">GO:0044427</a> | chromosomal part                             | 756       | 115         | 14.39    | 1.71e-74      | 1.62e-71     |
| <a href="#">GO:0044815</a> | DNA packaging complex                        | 85        | 42          | 1.62     | 4.29e-50      | 2.72e-47     |
| <a href="#">GO:0098687</a> | chromosomal region                           | 290       | 63          | 5.52     | 5.16e-49      | 2.45e-46     |
| <a href="#">GO:0043228</a> | non-membrane-bounded organelle               | 3480      | 179         | 66.23    | 2.04e-46      | 6.48e-44     |
| <a href="#">GO:0043232</a> | intracellular non-membrane-bounded organelle | 3480      | 179         | 66.23    | 2.04e-46      | 6.48e-44     |
| <a href="#">GO:0000228</a> | nuclear chromosome                           | 500       | 74          | 9.52     | 2.60e-45      | 7.05e-43     |
| <a href="#">GO:0000786</a> | Nucleosome                                   | 79        | 37          | 1.50     | 4.88e-43      | 1.16e-40     |
| <a href="#">GO:0044454</a> | nuclear chromosome part                      | 468       | 68          | 8.91     | 5.92e-41      | 1.25e-38     |
| <a href="#">GO:0031981</a> | nuclear lumen                                | 3463      | 168         | 65.91    | 8.45e-39      | 1.61e-36     |

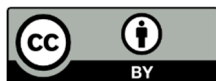

© 2020 by the authors. Submitted for possible open access publication under the terms and conditions of the Creative Commons Attribution (CC BY) license (<http://creativecommons.org/licenses/by/4.0/>).
